# Supplementary material for: Knowledge and attitudes of Australian general practitioners towards medicinal cannabis: a cross-sectional survey
Source: PubMed Central journal article supplement — BMJ Open. 2018 Jul 3;8(7):e022101. doi: 10.1136/bmjopen-2018-022101 (PMC6042562; doi:10.1136/bmjopen-2018-022101), 2018-07-03

# MEDICINAL CANNABIS SURVEY FOR GPs

|                                                                 |                                   |                                   |                                      |                                    |                                        |                                 |                                   |
|-----------------------------------------------------------------|-----------------------------------|-----------------------------------|--------------------------------------|------------------------------------|----------------------------------------|---------------------------------|-----------------------------------|
| Profession                                                      | GP<br><input type="checkbox"/>    | NURSE<br><input type="checkbox"/> | MIDWIFE<br><input type="checkbox"/>  | PHYSIO<br><input type="checkbox"/> | PHARMACIST<br><input type="checkbox"/> | O&G<br><input type="checkbox"/> | OTHER<br><input type="checkbox"/> |
| Age category                                                    | <35<br><input type="checkbox"/>   | 35-44<br><input type="checkbox"/> | 45-54<br><input type="checkbox"/>    | 55-64<br><input type="checkbox"/>  | 65+<br><input type="checkbox"/>        |                                 |                                   |
| Sex                                                             | M<br><input type="checkbox"/>     | F<br><input type="checkbox"/>     | OTHER<br><input type="checkbox"/>    |                                    |                                        |                                 |                                   |
| Years in general practice                                       | <2<br><input type="checkbox"/>    | 2-5<br><input type="checkbox"/>   | 6-15<br><input type="checkbox"/>     | 16-25<br><input type="checkbox"/>  | 26+<br><input type="checkbox"/>        |                                 |                                   |
| GP registrar?                                                   | Y<br><input type="checkbox"/>     | N<br><input type="checkbox"/>     |                                      |                                    |                                        |                                 |                                   |
| Average hours spend in clinical practice per week               | <10<br><input type="checkbox"/>   | 11-20<br><input type="checkbox"/> | 21-30<br><input type="checkbox"/>    | 31-40<br><input type="checkbox"/>  | >40<br><input type="checkbox"/>        |                                 |                                   |
| Size of Practice (number of GPs)                                | 1<br><input type="checkbox"/>     | 2-4<br><input type="checkbox"/>   | 5-9<br><input type="checkbox"/>      | 10-20<br><input type="checkbox"/>  | >20<br><input type="checkbox"/>        |                                 |                                   |
| State/Territory of the Practice you work in                     | NSW<br><input type="checkbox"/>   | VIC<br><input type="checkbox"/>   | QLD<br><input type="checkbox"/>      | SA<br><input type="checkbox"/>     | TAS<br><input type="checkbox"/>        | WA<br><input type="checkbox"/>  | ACT<br><input type="checkbox"/>   |
| Geographical area serviced                                      | METRO<br><input type="checkbox"/> |                                   | REGIONAL<br><input type="checkbox"/> |                                    | REMOTE<br><input type="checkbox"/>     |                                 |                                   |
| Did you attend the Women and Children's Health event this year? | Y<br><input type="checkbox"/>     | N<br><input type="checkbox"/>     |                                      |                                    |                                        |                                 |                                   |

|                                                                                                                        |                               |                               |                                 |                                  |                                 |
|------------------------------------------------------------------------------------------------------------------------|-------------------------------|-------------------------------|---------------------------------|----------------------------------|---------------------------------|
|                                                                                                                        | 0<br><input type="checkbox"/> | 1<br><input type="checkbox"/> | 2-5<br><input type="checkbox"/> | 6-10<br><input type="checkbox"/> | >10<br><input type="checkbox"/> |
| 1. In the past 3 months, how many of your patients have enquired about medicinal cannabis products?                    |                               |                               |                                 |                                  |                                 |
|                                                                                                                        | STRONGLY DISAGREE             | SLIGHTLY DISAGREE             | NEUTRAL                         | SLIGHTLY AGREE                   | STRONGLY AGREE                  |
| 2. I have patients who may benefit from medicinal cannabis                                                             | <input type="checkbox"/>      | <input type="checkbox"/>      | <input type="checkbox"/>        | <input type="checkbox"/>         | <input type="checkbox"/>        |
| 3. Medicinal cannabis products should be available on prescription now for certain indications                         | <input type="checkbox"/>      | <input type="checkbox"/>      | <input type="checkbox"/>        | <input type="checkbox"/>         | <input type="checkbox"/>        |
| 4. I feel comfortable discussing medicinal cannabis with my patients                                                   | <input type="checkbox"/>      | <input type="checkbox"/>      | <input type="checkbox"/>        | <input type="checkbox"/>         | <input type="checkbox"/>        |
| 5. I have good knowledge around the effects of medicinal cannabis products                                             | <input type="checkbox"/>      | <input type="checkbox"/>      | <input type="checkbox"/>        | <input type="checkbox"/>         | <input type="checkbox"/>        |
| 6. I am aware of the different medicinal cannabis products and formulations currently available                        | <input type="checkbox"/>      | <input type="checkbox"/>      | <input type="checkbox"/>        | <input type="checkbox"/>         | <input type="checkbox"/>        |
| 7. I would like the ability to prescribe medicinal cannabis products                                                   | <input type="checkbox"/>      | <input type="checkbox"/>      | <input type="checkbox"/>        | <input type="checkbox"/>         | <input type="checkbox"/>        |
| 8. Medicinal cannabis should only be prescribed by specialists                                                         | <input type="checkbox"/>      | <input type="checkbox"/>      | <input type="checkbox"/>        | <input type="checkbox"/>         | <input type="checkbox"/>        |
| 9. Medicinal cannabis should be provided in "shared care" with a specialist                                            | <input type="checkbox"/>      | <input type="checkbox"/>      | <input type="checkbox"/>        | <input type="checkbox"/>         | <input type="checkbox"/>        |
| 10. Only GPs who have undergone specific training and credentialing should be allowed to prescribe medicinal cannabis  | <input type="checkbox"/>      | <input type="checkbox"/>      | <input type="checkbox"/>        | <input type="checkbox"/>         | <input type="checkbox"/>        |
| 11. I know how to help patients legally access medicinal cannabis                                                      | <input type="checkbox"/>      | <input type="checkbox"/>      | <input type="checkbox"/>        | <input type="checkbox"/>         | <input type="checkbox"/>        |
| 12. I understand the current regulatory approach to medicinal cannabis                                                 | <input type="checkbox"/>      | <input type="checkbox"/>      | <input type="checkbox"/>        | <input type="checkbox"/>         | <input type="checkbox"/>        |
| 13. I understand the current RACGP position on medicinal cannabis                                                      | <input type="checkbox"/>      | <input type="checkbox"/>      | <input type="checkbox"/>        | <input type="checkbox"/>         | <input type="checkbox"/>        |
| 14. There is little difference between "street cannabis" and medicinal cannabis products                               | <input type="checkbox"/>      | <input type="checkbox"/>      | <input type="checkbox"/>        | <input type="checkbox"/>         | <input type="checkbox"/>        |
| 15. I will not prescribe medicinal cannabis as the risk of abuse and dependence is too high                            | <input type="checkbox"/>      | <input type="checkbox"/>      | <input type="checkbox"/>        | <input type="checkbox"/>         | <input type="checkbox"/>        |
| 16. I will not prescribe medicinal cannabis as the risk of side effects (other than abuse and dependence) is too high. | <input type="checkbox"/>      | <input type="checkbox"/>      | <input type="checkbox"/>        | <input type="checkbox"/>         | <input type="checkbox"/>        |
| 17. There is sufficient scientific evidence of the efficacy of medicinal cannabis                                      | <input type="checkbox"/>      | <input type="checkbox"/>      | <input type="checkbox"/>        | <input type="checkbox"/>         | <input type="checkbox"/>        |

STRONGLY DISAGREE    SLIGHTLY DISAGREE    NEUTRAL    SLIGHTLY AGREE    STRONGLY AGREE

18 . I support the use of medicinal cannabis in patients with:

|                                                 |                          |                          |                          |                          |                          |
|-------------------------------------------------|--------------------------|--------------------------|--------------------------|--------------------------|--------------------------|
| <i>Chronic cancer pain</i>                      | <input type="checkbox"/> |
| <i>Chronic non-cancer pain</i>                  | <input type="checkbox"/> |
| <i>Neuropathic pain</i>                         | <input type="checkbox"/> |
| <i>Intractable epilepsy</i>                     | <input type="checkbox"/> |
| <i>Anti-tumour effects</i>                      | <input type="checkbox"/> |
| <i>Spasticity in Multiple Sclerosis</i>         | <input type="checkbox"/> |
| <i>Dementia patients with agitation</i>         | <input type="checkbox"/> |
| <i>Insomnia</i>                                 | <input type="checkbox"/> |
| <i>PTSD</i>                                     | <input type="checkbox"/> |
| <i>Anxiety</i>                                  | <input type="checkbox"/> |
| <i>Depression</i>                               | <input type="checkbox"/> |
| <i>End of life/Palliative care</i>              | <input type="checkbox"/> |
| <i>Chemotherapy-induced nausea and vomiting</i> | <input type="checkbox"/> |
| <i>Cachexia associated with severe illness</i>  | <input type="checkbox"/> |

19 . The major side effects of medicinal cannabis consumption include:

|                                             |                          |                          |                          |                          |                          |
|---------------------------------------------|--------------------------|--------------------------|--------------------------|--------------------------|--------------------------|
| <i>Addiction and dependence</i>             | <input type="checkbox"/> |
| <i>Cognitive impairment</i>                 | <input type="checkbox"/> |
| <i>Driving impairment</i>                   | <input type="checkbox"/> |
| <i>Weight gain</i>                          | <input type="checkbox"/> |
| <i>Psychosis</i>                            | <input type="checkbox"/> |
| <i>Other long-term mental health issues</i> | <input type="checkbox"/> |
| <i>Interactions with other medications</i>  | <input type="checkbox"/> |
| <i>Impact on the developing brain</i>       | <input type="checkbox"/> |

20 . Medicinal cannabis is generally more hazardous than:

|                             |                          |                          |                          |                          |                          |
|-----------------------------|--------------------------|--------------------------|--------------------------|--------------------------|--------------------------|
| <i>Prescription opioids</i> | <input type="checkbox"/> |
| <i>Benzodiazepines</i>      | <input type="checkbox"/> |
| <i>Antipsychotics</i>       | <input type="checkbox"/> |
| <i>Statins</i>              | <input type="checkbox"/> |
| <i>Chemotherapy drugs</i>   | <input type="checkbox"/> |
| <i>Antidepressants</i>      | <input type="checkbox"/> |

21 . The right to prescribe medicinal cannabis should be available to: **CHOOSE ONE RESPONSE ONLY**

- All GPs*
- Only GPs with specific training and credentials*
- Only GPs in 'shared care' with a specialist*
- Only specialists*
- Medicinal cannabis should not be available on prescription*

**OPEN ENDED COMMENTS**

Please use this space to offer any comments, opinions or observations about medicinal cannabis in Australia

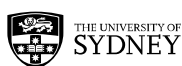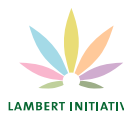

Supplement: bmjopen-2018-022101supp001.pdf [file bmjopen-2018-022101supp001.pdf]
