# Supplementary material for: Knowledge and attitudes of Australian general practitioners towards medicinal cannabis: a cross-sectional survey
Source: PubMed Central journal article supplement — BMJ Open. 2018 Jul 3;8(7):e022101. doi: 10.1136/bmjopen-2018-022101 (PMC6042562; doi:10.1136/bmjopen-2018-022101), 2018-07-03
Supplement: bmjopen-2018-022101.draft_revisions.pdf [file bmjopen-2018-022101.draft_revisions.pdf]

# BMJ Open

BMJ Open is committed to open peer review. As part of this commitment we make the peer review history of every article we publish publicly available.

When an article is published we post the peer reviewers' comments and the authors' responses online. We also post the versions of the paper that were used during peer review. These are the versions that the peer review comments apply to.

The versions of the paper that follow are the versions that were submitted during the peer review process. They are not the versions of record or the final published versions. They should not be cited or distributed as the published version of this manuscript.

BMJ Open is an open access journal and the full, final, typeset and author-corrected version of record of the manuscript is available on our site with no access controls, subscription charges or pay-per-view fees (<http://bmjopen.bmj.com>).

If you have any questions on BMJ Open's open peer review process please email [info.bmjopen@bmj.com](mailto:info.bmjopen@bmj.com)

# BMJ Open

## Knowledge and attitudes of Australian general practitioners towards medicinal cannabis: a cross-sectional survey

|                               |                                                                                                                                                                                                                                                                                                                                                                                                                                   |
|-------------------------------|-----------------------------------------------------------------------------------------------------------------------------------------------------------------------------------------------------------------------------------------------------------------------------------------------------------------------------------------------------------------------------------------------------------------------------------|
| Journal:                      | <i>BMJ Open</i>                                                                                                                                                                                                                                                                                                                                                                                                                   |
| Manuscript ID                 | bmjopen-2018-022101                                                                                                                                                                                                                                                                                                                                                                                                               |
| Article Type:                 | Research                                                                                                                                                                                                                                                                                                                                                                                                                          |
| Date Submitted by the Author: | 01-Feb-2018                                                                                                                                                                                                                                                                                                                                                                                                                       |
| Complete List of Authors:     | Karanges, Emily; The University of Sydney, The Lambert Initiative for Cannabinoid Therapeutics<br>Suraev, Anastasia; The University of Sydney, The Lambert Initiative for Cannabinoid Therapeutics<br>Elias, Natalie; The University of Sydney, The Lambert Initiative for Cannabinoid Therapeutics<br>Manocha, Ramesh; Healthed<br>McGregor, Iain; The University of Sydney, The Lambert Initiative for Cannabinoid Therapeutics |
| Keywords:                     | MEDICAL EDUCATION & TRAINING, QUALITATIVE RESEARCH, PRIMARY CARE                                                                                                                                                                                                                                                                                                                                                                  |
|                               |                                                                                                                                                                                                                                                                                                                                                                                                                                   |

SCHOLARONE™  
Manuscripts

1  
2  
3 **Knowledge and attitudes of Australian general practitioners towards medicinal cannabis: a**  
4  
5 **cross-sectional survey**  
6  
7

8  
9 Iain McGregor

10  
11 The Lambert Initiative for Cannabinoid Therapeutics

12  
13 The University of Sydney

14  
15 Level 6, Building M02F, Brain and Mind Centre,

16  
17 94 Mallett St, Camperdown, NSW, 2050

18  
19 [iain.mcgregor@sydney.edu.au](mailto:iain.mcgregor@sydney.edu.au)  
20  
21

22  
23 Emily A Karanges<sup>1</sup>

24  
25 Anastasia S Suraev<sup>1</sup>

26  
27 Natalie Elias<sup>1</sup>

28  
29 Ramesh Manocha<sup>2</sup>

30  
31 Iain S McGregor<sup>1</sup>  
32  
33

34  
35 <sup>1</sup>The Lambert Initiative for Cannabinoid Therapeutics, The University of Sydney, Sydney,  
36 Australia

37  
38 <sup>2</sup>Healthed, Sydney, Australia  
39  
40  
41  
42  
43

44  
45 Word count: 2,675  
46  
47  
48  
49  
50  
51  
52  
53  
54  
55  
56  
57  
58  
59  
60

## Abstract

**Objectives:** To examine the knowledge and attitudes of Australian general practitioners (GPs) towards medicinal cannabis, including patient demand, GP perceptions of therapeutic effects and potential harms, perceived knowledge and willingness to prescribe.

**Design, setting and participants:** A cross-sectional survey completed by 640 GPs (response rate = 37%) attending educational seminars in five major Australian cities between August and November 2017.

**Main outcome measures:** Number of patients enquiring about medicinal cannabis, perceived knowledge of GPs, conditions where GPs perceived it to be beneficial, willingness to prescribe, preferred models of access, perceived adverse effects, and safety relative to other prescription drugs.

**Results:** The majority of GPs (61.5%) reported one or more patient enquiry about medicinal cannabis in the last 3 months. Most felt that their own knowledge was inadequate and only 28.8% felt comfortable discussing medicinal cannabis with patients. Over half (56.5%) supported availability on prescription, with the preferred access model involving trained GPs prescribing independently of specialists. Support for use of medicinal cannabis was condition-specific, with strong support for use in cancer pain, palliative care and epilepsy, and much lower support for use in depression and anxiety.

**Conclusions:** The majority of GPs are supportive or neutral with regards to medicinal cannabis use. Our results highlight the need for improved training of GPs around medicinal cannabis, and the discrepancy between GP-preferred models of access and the current specialist-led models.

## Article Summary

### Strengths and limitations of this study

- This is the first study to have examined the attitudes and knowledge of Australian general practitioners (GPs) about medicinal cannabis.
- It shows that most GPs report inadequate knowledge of available medicinal cannabis products and patient access routes, confirming the need for better training and support for GPs in this area.
- Limitations include a self-selected sample who attend GP training events and are motivated to complete a survey on the topic.

## INTRODUCTION

There is strong and increasing public support for the use of medicinal cannabis in Australia.[1] This support has been a driver of a number of legislative and policy changes enacted over the last two years. These changes have allowed approved companies to cultivate cannabis plants and manufacture cannabis products, and have facilitated legal access to medicinal cannabis for approved patients.[2]

Despite this, patient access remains complex and highly restricted. Doctors wishing to prescribe medicinal cannabis products must either apply to become authorised prescribers for a class of patients, or apply for access for individual patients under the “Special Access Scheme Category B (SAS-B)”[3] via the Therapeutic Goods Administration (TGA), a regulatory body for therapeutic goods in Australia. Parallel approvals are also required from the relevant State or Territory Department of Health. Even with these approvals in place, patients often find available products prohibitively expensive.

Consequently, few doctors and patients are accessing medicinal cannabis in Australia. Currently, there are only about 30 authorised prescribers, servicing around 100 patients, and a further 150 patients granted SAS-B approval (TGA, personal communication, November 2017). This contrasts with the more mature access schemes of countries such as Canada, where approximately 200,000 patients are serviced.[4]

Under current schemes, Australian GPs are typically only permitted to prescribe medicinal cannabis if supported by a specialist.[3] Nonetheless, GPs are generally the first point of contact for patients enquiring about, or seeking access to, medicinal cannabis. Australian medical

1  
2  
3 bodies have warned that patient demand for medicinal cannabis is set to increase.[5] With  
4  
5 ongoing media coverage fuelling unrealistic patient expectations regarding therapeutic efficacy  
6  
7 and cannabis access,[6] GPs may be forced into the role of gatekeepers despite having limited  
8  
9 knowledge and training in the field.  
10  
11

12  
13 The attitudes of Australian GPs towards medicinal cannabis are unknown. Statements from  
14  
15 peak medical bodies such as the Royal Australian College of General Practitioners (RACGP),  
16  
17 Australian Medical Association (AMA) and the Australian, and New Zealand College of  
18  
19 Anaesthetists' (ANZCA) Faculty of Pain Management generally advise caution on the basis of  
20  
21 limited evidence for efficacy and safety.[5,7-9] Surveys from other countries suggest that  
22  
23 clinicians are generally more reticent toward medicinal cannabis than the general public,  
24  
25 particularly in the US,[10,11] with concerns centred on limited evidence for efficacy and  
26  
27 adverse effects, including abuse and dependence.[10-12] Nevertheless, recent analyses suggest  
28  
29 that the majority of GPs and specialists internationally support the use of medicinal cannabis  
30  
31 for specific conditions.[13]  
32  
33  
34  
35  
36  
37

38  
39 This article describes the results of a survey of Australian GPs on medicinal cannabis,  
40  
41 including their clinical experiences, perceived knowledge, and beliefs about its regulation,  
42  
43 safety, indications for use, and the preferred role of GPs in its prescription.  
44  
45

## 46 47 **METHODS** 48

49  
50 Printed surveys were distributed at one-day general practice educational seminars held in  
51  
52 five major Australian cities (Sydney, Melbourne, Brisbane, Adelaide, and Perth) between August  
53  
54 and November 2017. All GPs and GP registrars were eligible to participate (n = 1728). Seminars  
55  
56  
57

1  
2  
3 covered a range of topics relevant to general practice with around 18 different topics covered  
4  
5 on the day in consecutive 20 - 30 minute presentations. One of the authors (ISM) spoke on the  
6  
7 topic of medicinal cannabis at each event, but surveys were completed and collected prior to  
8  
9 this presentation.  
10  
11

12  
13 Participants first completed a series of closed questions on demographics, vocational  
14  
15 experience (years in practice, registrar status, hours per week), and practice characteristics  
16  
17 (size, state/territory, geographical classification). The survey proper consisted of 46 items on  
18  
19 topics related to medicinal cannabis including clinical experience (4 items); perceived  
20  
21 knowledge (5 items); concerns and awareness about safety and efficacy (18 items); appropriate  
22  
23 indications for use (14 items); and views on the role of GPs, and specialists in its prescribing (5  
24  
25 items).  
26  
27  
28  
29  
30

31 Participants rated the extent to which they agreed with 44 statements on a 5-point Likert  
32  
33 scale (1 = strongly disagree; 5 = strongly agree). There were also two multiple-choice questions  
34  
35 concerning patient demand and prescribing preferences (role of GPs/specialists). The latter was  
36  
37 introduced after the first seminar (included in 73% of completed surveys). A space for open-  
38  
39 ended comments was provided at the end of the survey. The study was approved by The  
40  
41 University of Sydney Human Research Ethics Committee (2017/692) and questions were  
42  
43 reviewed by an advisory group of GPs (copy of full survey available in the online supplementary  
44  
45 material).  
46  
47  
48  
49  
50

51 Results were summarised using descriptive statistics (frequency, percentage of valid  
52  
53 responses). As responses were largely complete, missing data were excluded from analyses.  
54  
55  
56  
57  
58  
59  
60



1  
2  
3 Likert scale responses were generally collapsed into three categories: Agree, Neutral, and  
4  
5 Disagree. Open-ended comments were reviewed for common themes. A composite score for  
6  
7 Perceived Knowledge was created by summing scores from five knowledge-related questions.  
8  
9  
10 Age, sex, and perceived knowledge were tested as potential predictors of views on medicinal  
11  
12 cannabis availability using separate ordinal logistic regression analyses. Chi-square tests were  
13  
14 used to investigate differences in responses after stratifying on specific items. Analyses were  
15  
16 conducted using IBM SPSS Statistics for Windows, version 24.0 (IBM Corp., Armonk, N.Y., USA),  
17  
18 and graphs were created using GraphPad Prism version 7.02 for Windows (GraphPad Software,  
19  
20 La Jolla, California, USA).  
21  
22  
23  
24

## 25 26 **RESULTS**

### 27 28 **Demographic data**

29  
30  
31 Demographic and practice details of the 640 participants are shown in Table 1. The majority  
32  
33 of participants were female (67.3%), aged between 35 and 64 years (77.5%), and residing in  
34  
35 Victoria (30.3%) and New South Wales (27.5%). Over half of respondents had been practicing  
36  
37 for >15 years (56.7%), worked >30 hours/week (63.4%), and serviced metropolitan areas  
38  
39 (60.3%). Only 8.2% were in single-GP practices and 7.9% were registrars.  
40  
41  
42  
43  
44  
45  
46  
47  
48  
49  
50  
51  
52  
53  
54  
55  
56  
57  
58  
59  
60

**Table 1. Demographic and practice characteristics of GPs in this study, and all GPs in Australia.**

|                                    | GP survey (n = 640) |         | Australia<br>(n = 34606)[25] | p (X <sup>2</sup> test) |
|------------------------------------|---------------------|---------|------------------------------|-------------------------|
|                                    | n                   | Valid % | %                            |                         |
| <b>Age (n = 640)</b>               |                     |         |                              | <0.001                  |
| <35                                | 57                  | 8.9     | 13.4                         |                         |
| 35-44                              | 134                 | 20.9    | 24.9                         |                         |
| 45-54                              | 177                 | 27.7    | 24.9                         |                         |
| 55-64                              | 185                 | 28.9    | 23.1                         |                         |
| 65+                                | 87                  | 13.6    | 13.7                         |                         |
| <b>Sex (n = 636)</b>               |                     |         |                              | <0.001                  |
| Female                             | 428                 | 67.3    | 44.7                         |                         |
| <b>GP registrar (n = 611)</b>      |                     |         |                              | 0.08                    |
| Yes                                | 48                  | 7.9     | 10.0                         |                         |
| <b>State/territory (n = 627)</b>   |                     |         |                              | 0.001                   |
| New South Wales                    | 175                 | 27.9    | 30.6                         |                         |
| Victoria                           | 193                 | 30.8    | 24.1                         |                         |
| Queensland                         | 129                 | 20.6    | 21.7                         |                         |
| South Australia                    | 81                  | 12.9    | 7.8                          |                         |
| Western Australia                  | 39                  | 6.2     | 10.2                         |                         |
| <b>Geographical area (n = 611)</b> |                     |         |                              | 0.01                    |
| Metropolitan                       | 381                 | 62.4    | 68.2                         |                         |
| Regional                           | 206                 | 33.7    | 28.0                         |                         |
| Remote                             | 24                  | 3.9     | 3.9                          |                         |
| <b>Years as GP (n = 637)</b>       |                     |         |                              |                         |
| <2                                 | 38                  | 6.0     |                              |                         |
| 2-5                                | 90                  | 14.1    |                              |                         |
| 6-15                               | 148                 | 23.2    |                              |                         |
| 16-25                              | 136                 | 21.4    |                              |                         |
| 26+                                | 225                 | 35.3    |                              |                         |

### Experience, practice and general attitudes

A majority of GPs (61.5%) had experienced at least one patient enquiry regarding medicinal cannabis in the prior three months, with 7.5% reporting more than five enquiries. When considering GPs working >30 hours/week, the proportion with at least one enquiry increased to 69.0% and 11.8% received more than five enquiries (Table 2).

**Table 2. Reported number of patient enquiries about medicinal cannabis in the prior three months, for all respondents and those working over 30 hours per week, on average.**

| Number of patients enquiring | All respondents (n = 615) |      | Respondents >30 h/week (n = 391) |      |
|------------------------------|---------------------------|------|----------------------------------|------|
|                              | N                         | %    | N                                | %    |
| 0                            | 237                       | 38.5 | 116                              | 31.0 |
| 1                            | 159                       | 25.9 | 90                               | 24.1 |
| 2-5                          | 173                       | 28.1 | 124                              | 33.2 |
| 6-10                         | 33                        | 5.4  | 32                               | 8.6  |
| >10                          | 13                        | 2.1  | 12                               | 3.2  |

More than half of GPs agreed with the statement that medicinal cannabis should currently be available on prescription for certain indications (strongly agree: 19.6%, n = 125/637; slightly agree: 36.9%), while 14.9% disagreed (Figure 1). GPs were more likely to agree if they were older ( $\chi^2(4) = 25.63, p < 0.001$ ) and had greater perceived knowledge ( $\chi^2(2) = 5.54, p = 0.02$ ), but there was no difference between sexes ( $\chi^2(1) = 2.55, p = 0.11$ ).

More GPs agreed that they had patients who would benefit from medicinal cannabis (44.0%, n = 280/636) than disagreed (21.4%), with 34.6% expressing a neutral opinion (Figure 1). Conversely, fewer respondents agreed that they would like to be able to prescribe medicinal

1  
2  
3 cannabis (28.9%, n = 183/633) than disagreed (33.8%), again with a high number of neutral  
4  
5 responses. Approximately half of respondents (n = 51.9%; n = 328/632) did not feel comfortable  
6  
7 discussing medicinal cannabis with their patients.  
8  
9

### 10 11 **Perceived knowledge**

12  
13  
14 GPs generally rated their knowledge of medicinal cannabis as poor (Figure 2). On all five  
15  
16 knowledge-related items, over two-thirds of respondents disagreed that they had knowledge of  
17  
18 the topic in question. Notably, 65.4% (n = 417/638) 'strongly disagreed' that they knew how to  
19  
20 access medicinal cannabis for patients, and more than half 'strongly disagreed' that they knew  
21  
22 about available products (55.5%, n = 354/638) or the current regulatory approach (57.8%, n =  
23  
24 370/630).  
25  
26  
27  
28

### 29 30 **Views on medicinal cannabis access models**

31  
32  
33 Respondents were more likely to endorse an access model permitting prescribing by  
34  
35 trained and accredited GPs (78.6% agree, n = 503/640), or by GPs in a 'shared care'  
36  
37 arrangement with a specialist (63.2%, n = 401/634) than specialist-only prescribing (44.6%, n =  
38  
39 283/634). When asked to choose one preferred model, 41.2% (n = 164/398; excludes Sydney  
40  
41 participants) indicated trained GPs as their preferred prescriber, followed by shared care  
42  
43 (29.6%). Specialist-only prescribing was preferred by 14.6% of respondents, while only 12.1%  
44  
45 preferred that all GPs have the right to prescribe.  
46  
47  
48  
49  
50  
51  
52  
53  
54  
55  
56  
57  
58  
59  
60

### Indications for use and evidence for efficacy

Almost half of respondents (48.0%, n = 305/635) were neutral as to whether there was sufficient scientific evidence for the efficacy of medicinal cannabis, with 22.8% supporting the statement. Those who agreed that medicinal cannabis should be available on prescription had higher endorsement of the statement than those who disagreed (40.2% versus 11.7%). The most highly endorsed indications for use were chronic cancer pain (80.2% agree, n = 506/631), palliative care (78.8%, n = 494/627), and intractable epilepsy (70.3%, n = 441/627; Figure 3). Use in chronic non-cancer pain and neuropathic pain was endorsed by 39.1% (n = 246/629), and 38.3% (n = 241/630) of respondents respectively, with a high degree of neutrality. Less than 15% of GPs supported use in anxiety, insomnia or depression.

### Perceived features and adverse effects of medicinal cannabis

Approximately two-thirds of respondents disagreed with the statement that medicinal cannabis was no different to street cannabis (43.9% strongly disagree; n = 271/640; 20.5% slightly disagree), while 14.4% agreed.

The side effects of medicinal cannabis endorsed by more than half of respondents were driving impairment (64.9% agree, n = 408/629), adverse effects on the developing brain (58.4%, n = 366/627), cognitive impairment (56.5%, n = 356/630), and addiction and dependence (56.3%, n = 353/627); psychosis was endorsed by 49.9% (n = 313/627).

Overall, 27.7% of respondents (n = 177/637) agreed that they would not prescribe medicinal cannabis due to the risk of abuse and dependence, and 19.8% (n = 127/638) due to other side effects. These proportions were higher among GPs who disagreed with the

1  
2  
3 availability of medicinal cannabis on prescription (58.1% and 44.2% respectively) and among  
4  
5 those who disagreed that they would like to prescribe medicinal cannabis (47.6% and 34.6%  
6  
7 respectively).  
8  
9

10  
11 A high proportion of GPs were neutral with respect to whether medicinal cannabis was  
12  
13 more hazardous than other prescription medicines (range: 43.7% to 51.3%; Figure 4). Of the  
14  
15 remaining responses, a majority believed that medicinal cannabis was safer than chemotherapy  
16  
17 drugs (78.1%, n = 278/356), opioid analgesics (75.6%, n = 248/328), benzodiazepines (74.5%, n  
18  
19 = 248/333) and antipsychotics (68.3%, n = 209/306), and over 50% for antidepressants and  
20  
21 statins.  
22  
23  
24  
25

### 26 **Open-ended responses**

27  
28  
29 Of the 156 open-ended responses, 48.1% concerned the participant's lack of knowledge  
30  
31 about medicinal cannabis and/or the desire for training. Other common themes included the  
32  
33 need for more evidence of efficacy (n = 18) and concerns about harms (n = 19), namely abuse  
34  
35 and dependence (n = 10), cannabis-seeking for recreational use (n = 5), repeating mistakes  
36  
37 made with opioids/benzodiazepines (n = 6) and other side effects (n = 4).  
38  
39  
40  
41

### 42 **DISCUSSION**

43  
44  
45 To our knowledge, this is the first study of the experiences, attitudes and knowledge of  
46  
47 Australian GPs regarding medicinal cannabis. The survey demonstrates that many GPs have  
48  
49 fielded recent enquiries about medicinal cannabis from their patients, yet half were not  
50  
51 comfortable dealing these enquiries and most felt poorly informed about medicinal cannabis  
52  
53 and its current regulation and uses. This perceived lack of knowledge was strongly conveyed in  
54  
55  
56  
57  
58  
59  
60

1  
2  
3 the open-ended comments, as well as broadly reflected in the large number of neutral  
4  
5 responses to questions regarding therapeutic and adverse effects.  
6  
7

8  
9 In agreement with international clinician surveys,[10,11] Australian GPs were somewhat  
10  
11 conservative in their attitudes about medicinal cannabis: only about half agreed that medicinal  
12  
13 cannabis should be available on prescription compared to approximately 85% of the general  
14  
15 Australian population.[1] GPs were generally more supportive of use of medicinal cannabis in  
16  
17 conditions with a stronger evidence-base (such as spasticity in multiple sclerosis,  
18  
19 chemotherapy-induced nausea/vomiting) and/or where few effective alternatives exist  
20  
21 (palliative care, cancer pain, intractable epilepsy).[14] This also aligns with the indications for  
22  
23 use suggested by various state governments.[15,16] By contrast, less than 40% of GPs  
24  
25 supported use of medicinal cannabis in chronic non-cancer pain. This may reflect the mixed  
26  
27 findings regarding efficacy for this indication,[14,17] concerns about inappropriate use,  
28  
29 particularly in light of the problems associated with prescription opioids,[18] and the lack of  
30  
31 endorsement by Australian government and medical organisations.[9,15] Similarly, concerns  
32  
33 about limited evidence for efficacy, risk of worsening illness, and inappropriate use may  
34  
35 underlie the very low support for use in depression, anxiety and insomnia.[14,15] It is  
36  
37 somewhat troubling that these latter indications were among the most common reasons for  
38  
39 illegal use of cannabis for medicinal purposes in a survey of more than 1700 current users in the  
40  
41 Australian community (Lintzeris *et al*, under review).  
42  
43  
44  
45  
46  
47  
48  
49

50  
51 Although GPs exhibited responses that suggested at least some familiarity with the  
52  
53 scientific and clinical literature, perceived knowledge about the effects, products and process of  
54  
55 accessing medicinal cannabis was generally very low. Less than 10% of GPs in our survey  
56  
57  
58  
59

1  
2  
3 reported understanding the current regulations concerning medicinal cannabis or how it can be  
4 accessed for patients. It is well known that poor knowledge and low levels of comfort discussing  
5 issues with patients are barriers to optimal patient care.[11,19] Provision of continuing medical  
6 education and guidelines on the regulatory, pharmacological and clinical aspects of medicinal  
7 cannabis are vital for equipping GPs to manage patients effectively.  
8  
9  
10  
11  
12  
13  
14  
15

16 One surprising aspect of this survey was how GPs rated medicinal cannabis relative to other  
17 common classes of prescription medicines. Of those expressing a non-neutral opinion  
18 (approximately 50%), about three-quarters rated medicinal cannabis as less harmful than  
19 opioids and benzodiazepines, and notably, just over half rated it less harmful than  
20 antidepressants and statins. This perception of the relative safety of medicinal cannabis  
21 compared to opioids and benzodiazepines may reflect its negligible rate of mortality and  
22 relatively mild dependence and withdrawal syndrome.[20] Nonetheless, cannabis can clearly  
23 produce dependence; recent estimates suggest that there are over 45,000 treatment episodes  
24 each year for Australians seeking control over their cannabis use.[21] Concerns about abuse,  
25 misuse and dependence was an identified theme of the open-ended comments in our survey.  
26 Moreover, almost half of the GPs who did not want to be able to prescribe cannabis cited the  
27 risk of abuse and dependence as a primary concern.  
28  
29  
30  
31  
32  
33  
34  
35  
36  
37  
38  
39  
40  
41  
42  
43  
44  
45

46 Although there was a high degree of neutrality with respect to the desire of GPs to  
47 prescribe medicinal cannabis, the vast majority supported a model of prescribing in which GPs  
48 played a significant role. A model in which trained, accredited GPs could prescribe without  
49 specialist input received the strongest support, followed by GP prescribing in a 'shared care'  
50 arrangement with a specialist. This contrasts with the current model in Australia, where  
51  
52  
53  
54  
55  
56  
57  
58  
59  
60



1  
2  
3 prescribing is conducted by specialists, although shared care arrangements are theoretically  
4 possible.[3] Although specialist-only prescribing may provide greater restrictions on use, the  
5  
6 extension of prescribing rights to appropriately trained GPs arguably enables more holistic  
7  
8 patient care, more frequent monitoring, better detection of adverse effects, and more timely  
9  
10 treatment.[22] It is notable that GPs are empowered to prescribe, or permit access to,  
11  
12 medicinal cannabis products in countries such as Canada and the United States.[11,19,23]  
13  
14  
15  
16  
17

18 The strength of the study is the unique nature of the survey and the relatively large  
19  
20 sample size enabled by accessing the GPs attending popular educational events. While our  
21  
22 response rate of 37% appears relatively low, it exceeds typical published response rates of GP  
23  
24 surveys[24]. Limitations relate to accessing a subpopulation of GPs that are motivated to attend  
25  
26 such events and to fill out a survey on medicinal cannabis. Another limitation of the study is  
27  
28 that the findings cannot be generalised to other countries such as the United States and  
29  
30 Canada, among others, where access to medicinal cannabis is not as strictly regulated. There  
31  
32 was also a disproportionate representation of female GPs in our study, which may be due to a  
33  
34 tendency for greater survey response from females relative to males in general.[26]  
35  
36  
37  
38  
39  
40

41 In conclusion, our results demonstrate guarded support for medicinal cannabis  
42  
43 availability among Australian GPs, but very low levels of perceived knowledge. Clearly, there is  
44  
45 an urgent need for improved training of GPs around medicinal cannabis, and, in the future, a  
46  
47 reconsideration of the role of GPs in its prescription.  
48  
49  
50  
51  
52  
53  
54  
55  
56  
57  
58  
59  
60

## Acknowledgements

The authors gratefully acknowledge the contribution of 'HealthEd' seminar organisers, who assisted with recruitment, printed and administered the questionnaires.

## Funding statement

This work was supported by The Lambert Initiative for Cannabinoid Therapeutics, The University of Sydney, and an Australian National Health and Medical Research Council (NHMRC) Principal Research Fellowship held by ISM.

## Competing Interests

This study was supported by the Lambert Initiative for Cannabinoid Therapeutics, a philanthropically-funded centre for medicinal cannabis research at the University of Sydney. Iain McGregor is Academic Director of the Lambert Initiative and an NHMRC Principal Research Fellow and receives research funding from the ARC and NHMRC. He is involved in an NHMRC-funded clinical trial using the cannabis extract, Sativex. This survey was conducted at seminars run by HealthEd. Ramesh Manocha is the CEO of HealthEd, and Iain McGregor received speaker fees from HealthEd for lectures on conducted at these events. All other authors have no competing interests to declare.

### Author contributions

R.M., I.S.M., E.A.K., A.S., and N.E. conceived the study; I.S.M. collected the data; E.A.K. and I.S.M. conducted the data analysis and wrote the manuscript; All authors reviewed the manuscript.

### Ethics approval

Ethical approval for the survey was granted by The University of Sydney Human Research Ethics Committee.

### Data sharing statement

No additional data are available.

### REFERENCES

1. Australian Institute of Health and Welfare. National Drug Strategy Household Survey 2016: detailed findings. (Drug Statistics series no. 31. Cat. no. PHE 214.). Canberra: AIHW; 2017. <https://www.aihw.gov.au/getmedia/15db8c15-7062-4cde-bfa4-3c2079f30af3/21028.pdf.aspx?inline=true> (accessed Nov 2017).
2. Therapeutic Goods Administration. Medicinal cannabis products: overview of regulation. Canberra: TGA; 2017. <https://www.tga.gov.au/medicinal-cannabis-products-overview-regulation> (accessed Nov 2017).

- 1  
2  
3 3. Therapeutic Goods Administration. Access to medicinal cannabis products: steps to  
4 using access schemes. Canberra: TGA; 2017. [https://www.tga.gov.au/access-medicinal-](https://www.tga.gov.au/access-medicinal-cannabis-products-steps-using-access-schemes)  
5  
6 cannabis-products-steps-using-access-schemes (accessed Dec 2017).  
7  
8
- 9  
10 4. Health Canada. Market Data. Cannabis for Medical Purposes (FY 2017-18) - Licensed  
11 Producers: Monthly Data Ontario: Health Canada; 2017. [https://www.canada.ca/en/health-](https://www.canada.ca/en/health-canada/services/drugs-health-products/medical-use-marijuana/licensed-producers/market-data.html)  
12  
13 canada/services/drugs-health-products/medical-use-marijuana/licensed-producers/market-  
14  
15 data.html (accessed Nov 2017).  
16  
17
- 18 5. Royal Australian College of General Practitioners. RACGP Position statement: Medicinal  
19 use of cannabis products. Melbourne: RACGP; 2016.  
20  
21 [https://www.racgp.org.au/support/policies/clinical-and-practice-management/racgp-position-](https://www.racgp.org.au/support/policies/clinical-and-practice-management/racgp-position-statement-medicinal-use-of-cannabis-products/)  
22  
23 statement-medicinal-use-of-cannabis-products/ (accessed Oct 2017).  
24  
25
- 26 6. Gates P, Todd S, Copeland J. Survey of Australian's knowledge, perception and use of  
27 cannabis for medicinal purposes. *J Addict Prev* 2017;5(1):10.  
28  
29
- 30 7. Bartone T. Medicinal cannabis - still a lot of misinformation. Barton, ACT: Australian  
31 Medical Association; 2017. [https://ama.com.au/ausmed/medicinal-cannabis-%E2%80%93-still-](https://ama.com.au/ausmed/medicinal-cannabis-%E2%80%93-still-lot-misinformation)  
32  
33 lot-misinformation (accessed Oct 26 2017).  
34  
35
- 36 8. Johnson C. Green light for medicinal cannabis but AMA says proceed with caution.  
37 *Australian Medicine* 2017;29(3):9.  
38  
39
- 40 9. Faculty of Pain Medicine. Statement on "Medicinal Cannabis" with particular reference  
41 to its use in the management of patients with chronic non-cancer pain. Melbourne: Australian  
42 and New Zealand College of Anaesthetists Faculty of Pain Medicine; 2015.  
43  
44  
45 <http://fpm.anzca.edu.au/documents/pm10-april-2015.pdf> (accessed Nov 2017).  
46  
47  
48  
49  
50  
51  
52  
53  
54  
55  
56  
57  
58  
59  
60

- 1  
2  
3 10. Charuvastra A, Friedmann PD, Stein MD. Physician attitudes regarding the prescription  
4 of medical marijuana. *J Addict Dis* 2005;24(3):87-93.  
5  
6  
7  
8 11. Kondrad E, Reid A. Colorado family physicians' attitudes toward medical marijuana. *J Am*  
9  
10 *Board Fam Med* 2013;26(1):52-60.  
11  
12  
13 12. Crowley D, Collins C, Delargy I, et al. Irish general practitioner attitudes toward  
14  
15 decriminalisation and medical use of cannabis: results from a national survey. *Harm Reduct J*  
16  
17 2017;14(1):4.  
18  
19  
20 13. Adler JN, Colbert JA. Medicinal Use of Marijuana — Polling Results. *N Engl J Med*  
21  
22 2013;368(22):e30.  
23  
24  
25 14. National Academies of Sciences E, and Medicine,. The health effects of cannabis and  
26  
27 cannabinoids: The current state of evidence and recommendations for research. Washington,  
28  
29 DC: National Academies Press; 2017. <https://www.ncbi.nlm.nih.gov/books/NBK423845/>  
30  
31 (accessed Nov 2017).  
32  
33  
34  
35 15. Queensland Health. Clinical Guidance: for the use of medicinal cannabis products in  
36  
37 Queensland. Brisbane: Queensland Health; 2017.  
38  
39  
40 [https://www.health.qld.gov.au/\\_\\_data/assets/pdf\\_file/0023/634163/med-cannabis-clinical-](https://www.health.qld.gov.au/__data/assets/pdf_file/0023/634163/med-cannabis-clinical-guide.pdf)  
41  
42 [guide.pdf](https://www.health.qld.gov.au/__data/assets/pdf_file/0023/634163/med-cannabis-clinical-guide.pdf) (accessed Nov 2017).  
43  
44  
45 16. Victorian Law Reform Commission. Medicinal cannabis: report. Melbourne: Victorian  
46  
47 Law Reform Commission; 2015. [http://lawreform.vic.gov.au/projects/medicinal-](http://lawreform.vic.gov.au/projects/medicinal-cannabis/medicinal-cannabis-report-pdf)  
48  
49 [cannabis/medicinal-cannabis-report-pdf](http://lawreform.vic.gov.au/projects/medicinal-cannabis/medicinal-cannabis-report-pdf) (accessed Nov 2017).  
50  
51  
52  
53  
54  
55  
56  
57  
58  
59  
60

- 1  
2  
3 17. Nugent SM, Morasco BJ, O'Neil ME, et al. The Effects of Cannabis Among Adults With  
4 Chronic Pain and an Overview of General Harms: A Systematic Review. *Ann Intern Med*  
5  
6 2017;167(5):319-331.  
7  
8  
9  
10 18. Australian and New Zealand College of Anaesthetists. 'Medicinal' cannabis: Where's the  
11 evidence? ANZCA Bulletin, September 2016. Victoria: ANZCA; 2016.  
12  
13 www.anzca.edu.au/documents/anzca-bulletin-september-2016.pdf (accessed Nov 2017).  
14  
15  
16 19. Carlini BH, Garrett SB, Carter GT. Medicinal cannabis: a survey among health care  
17 providers in Washington state. *Am J Hosp Palliat Care* 2017;34(1):85-91.  
18  
19  
20 20. Nutt D, King LA, Saulsbury W, et al. Development of a rational scale to assess the harm  
21 of drugs of potential misuse. *Lancet* 2007;369(9566):1047-1053.  
22  
23  
24 21. Australian Institute of Health and Welfare. Alcohol and other drug treatment services in  
25 Australia 2015–16: key findings, Table S2. Canberra: AIHW; 2017.  
26  
27 https://www.aihw.gov.au/reports/alcohol-other-drug-treatment-services/aodts-2015-16-key-  
28 findings/data (accessed Nov 2017).  
29  
30  
31 22. Royal Australian College of General Practitioners. RACGP Submission: GP prescribing  
32 rights for Isotretinoin. Melbourne: RACGP; 2014.  
33  
34 https://www.racgp.org.au/yourracgp/news/reports/201405isotretinoin (accessed Nov 2017).  
35  
36  
37 23. Ziemianski D, Capler R, Tekanoff R, et al. Cannabis in medicine: a national educational  
38 needs assessment among Canadian physicians. *BMC Med Educ* 2015;15:52.  
39  
40  
41 24. Bonevski B, Magin P, Horton G, et al. Response rates in GP surveys - trialling two  
42 recruitment strategies. *Aust Fam Physician* 2011;40(6):427-430.  
43  
44  
45  
46  
47  
48  
49  
50  
51  
52  
53  
54  
55  
56  
57  
58  
59  
60

- 1  
2  
3 25. Department of Health. GP Workforce Statistics – 2001-02 to 2016-17. Canberra:  
4  
5 Commonwealth of Australia; 2017.  
6  
7  
8 <http://www.health.gov.au/internet/main/publishing.nsf/content/General+Practice+Statistics-1>  
9  
10 (accessed Nov 2017).  
11  
12  
13 26. Cull W, O’Conner K, Sharp S, et al. Respond rates and response bias for 50 survey for  
14  
15 pediatricians. *Health Services Research* 2005; 40(1):213-226  
16  
17  
18  
19  
20

### 21 **Figure legends**

22  
23  
24 Figure 1. Attitudes and clinical experiences of general practitioners with respect to medicinal  
25  
26 cannabis, n = 632 – 637.

27  
28  
29 Figure 2. Ratings of general practitioners on knowledge-related items, n = 636 – 640.

30  
31 RACGP=Royal Australian College of General Practitioners.

32  
33  
34 Figure 3. Support for use of medicinal cannabis in different conditions, n = 627 – 632.

35  
36  
37 CINV=Chemo-induced nausea and vomiting; MS=Multiple sclerosis; PTSD=Post-traumatic stress  
38  
39 disorder.  
40  
41

42  
43 Figure 4. Ratings of relative hazards of medicinal cannabis compared to other prescription  
44  
45 medicines, n = 627 – 632.  
46  
47  
48  
49  
50  
51  
52  
53  
54  
55  
56  
57  
58  
59  
60

1  
2  
3  
4  
5  
6  
7  
8  
9  
10  
11  
12  
13  
14  
15  
16  
17  
18  
19  
20  
21  
22  
23  
24  
25  
26  
27  
28  
29  
30  
31  
32  
33  
34  
35  
36  
37  
38  
39  
40  
41  
42  
43  
44  
45  
46  
47  
48  
49  
50  
51  
52  
53  
54  
55  
56  
57  
58  
59  
60

For peer review only - <http://bmjopen.bmj.com/site/about/guidelines.xhtml>

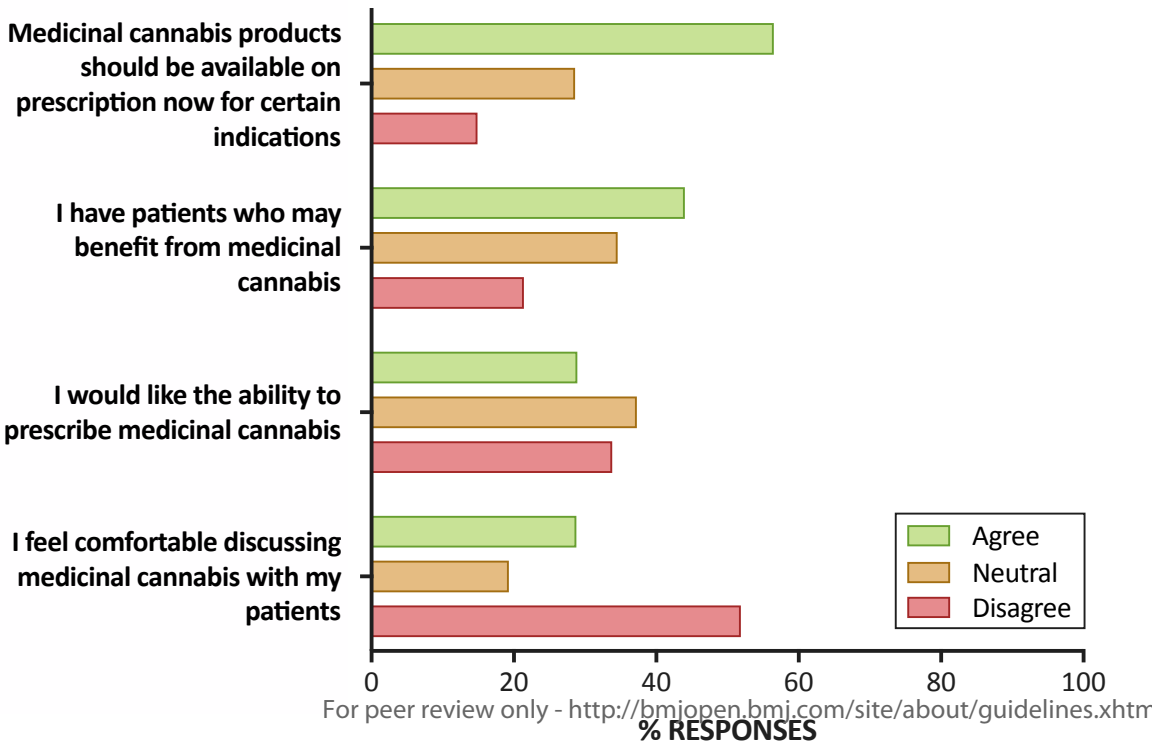



1  
2  
3  
4  
5  
6  
7  
8  
9  
10  
11  
12  
13  
14  
15  
16  
17  
18  
19  
20  
21  
22  
23  
24  
25  
26  
27  
28  
29  
30  
31  
32  
33  
34  
35  
36  
37  
38  
39  
40  
41  
42  
43  
44  
45  
46  
47  
48  
49  
50  
51  
52  
53  
54  
55  
56  
57  
58  
59  
60

For peer review only

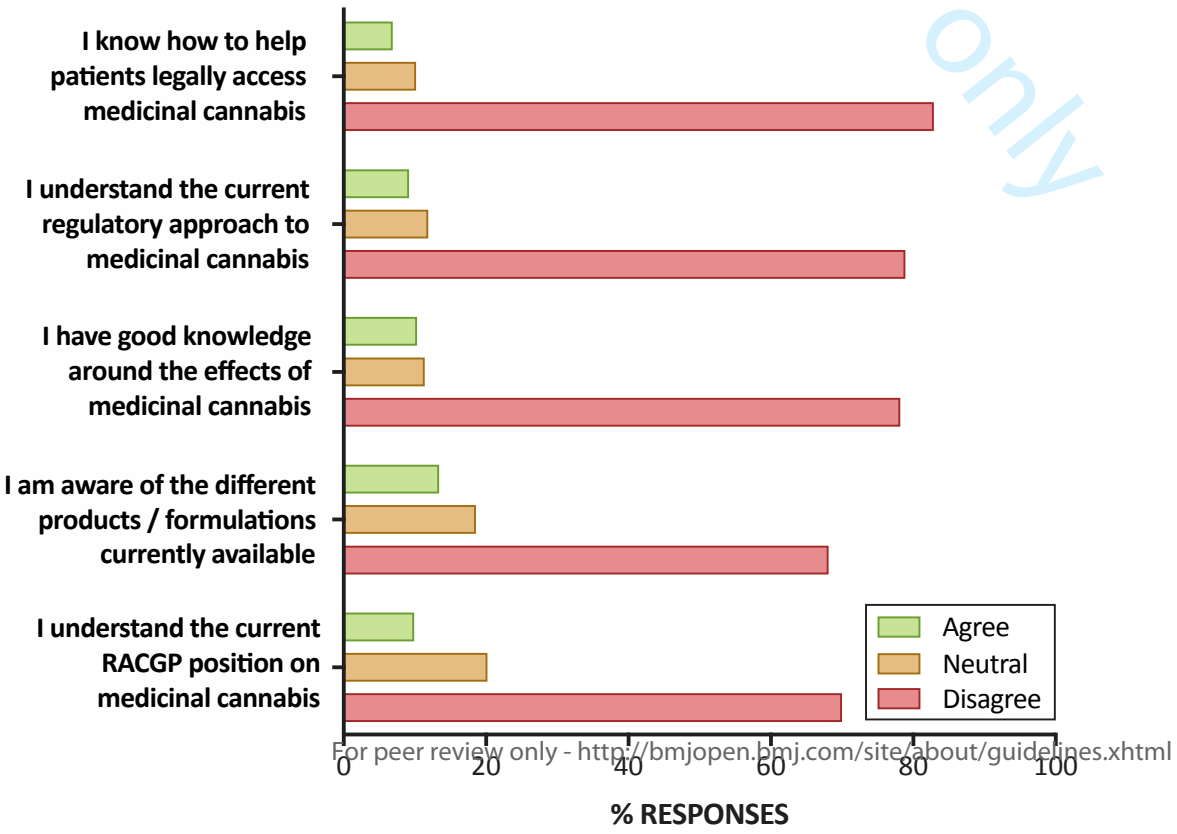

1  
2  
3  
4  
5  
6  
7  
8  
9  
10  
11  
12  
13  
14  
15  
16  
17  
18  
19  
20  
21  
22  
23  
24  
25  
26  
27  
28  
29  
30  
31  
32  
33  
34  
35  
36  
37  
38  
39  
40  
41  
42  
43  
44  
45  
46  
47  
48  
49  
50  
51  
52  
53  
54  
55  
56  
57  
58  
59  
60

*I support the use of medicinal cannabis in patients with.....*

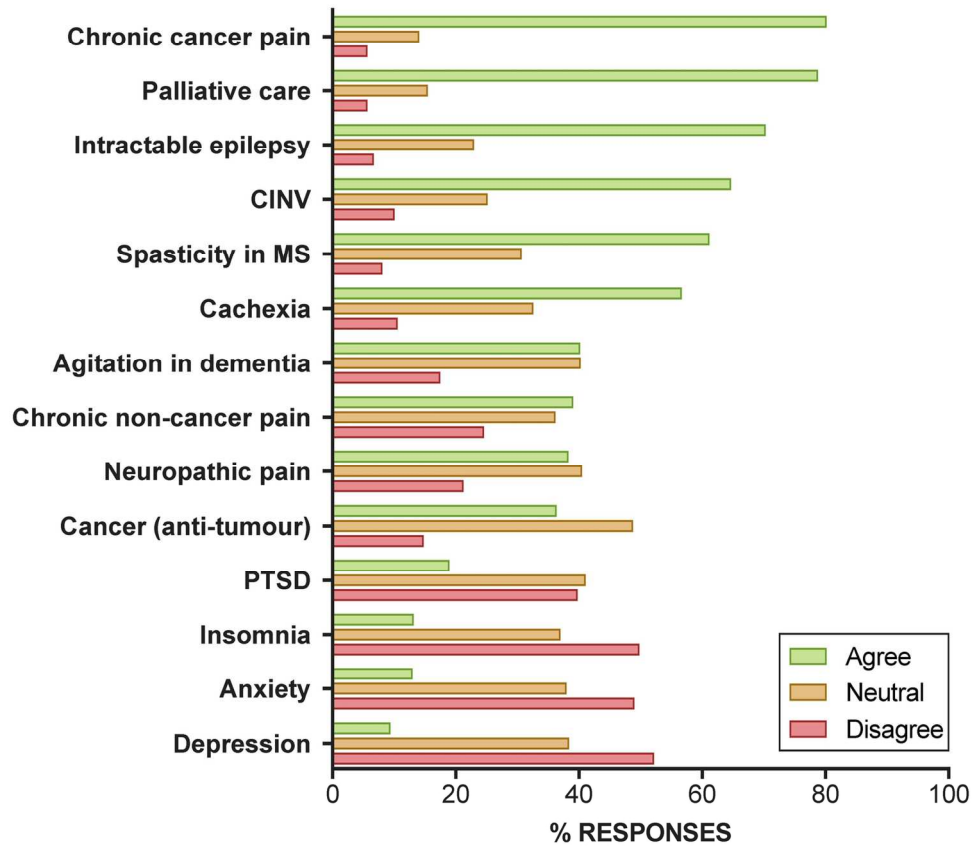

Figure 3. Support for use of medicinal cannabis in different conditions, n = 627 - 632. CINV=Chemo-induced nausea and vomiting; MS=Multiple sclerosis; PTSD=Post-traumatic stress disorder.

145x137mm (300 x 300 DPI)

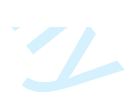

1  
2  
3  
4  
5  
6  
7  
8  
9  
10  
11  
12  
13  
14  
15  
16  
17  
18  
19  
20  
21  
22  
23  
24  
25  
26  
27  
28  
29  
30  
31  
32  
33  
34  
35  
36  
37  
38  
39  
40  
41  
42  
43  
44  
45  
46  
47  
48  
49  
50  
51  
52  
53  
54  
55  
56  
57  
58  
59  
60

For peer review only

**Medicinal cannabis is generally more hazardous than.....**

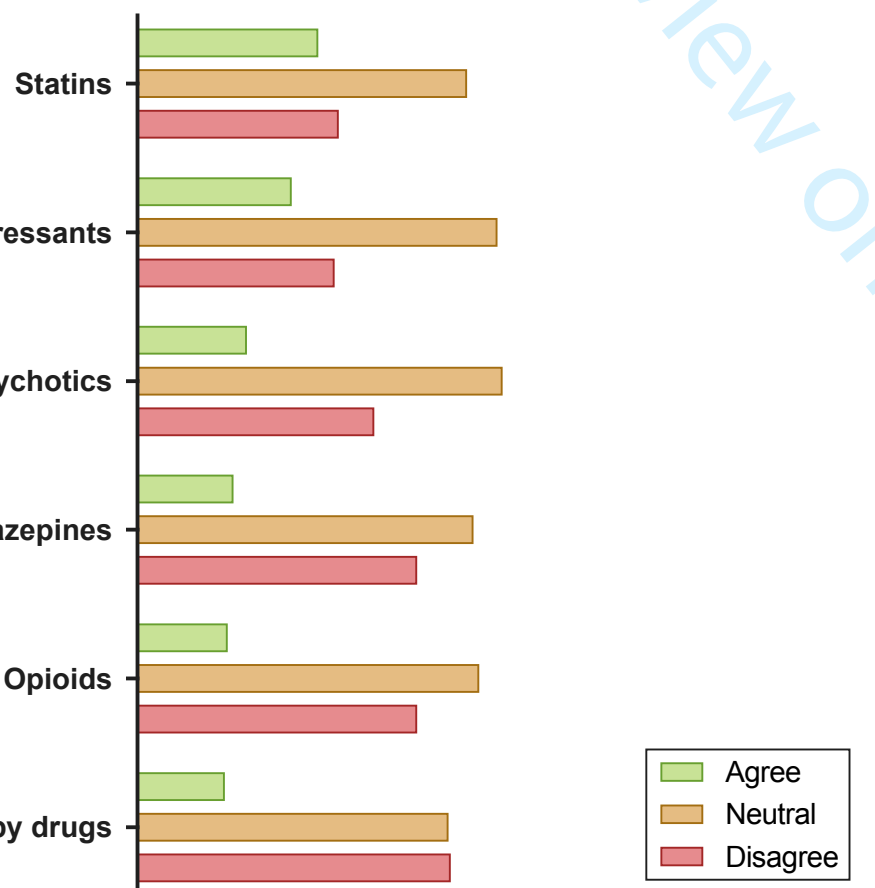

# MEDICINAL CANNABIS SURVEY FOR GPs

|                                                                 |                                |                                |                                   |                                 |                                     |                              |                                |
|-----------------------------------------------------------------|--------------------------------|--------------------------------|-----------------------------------|---------------------------------|-------------------------------------|------------------------------|--------------------------------|
| Profession                                                      | <input type="checkbox"/> GP    | <input type="checkbox"/> NURSE | <input type="checkbox"/> MIDWIFE  | <input type="checkbox"/> PHYSIO | <input type="checkbox"/> PHARMACIST | <input type="checkbox"/> O&G | <input type="checkbox"/> OTHER |
| Age category                                                    | <input type="checkbox"/> <35   | <input type="checkbox"/> 35-44 | <input type="checkbox"/> 45-54    | <input type="checkbox"/> 55-64  | <input type="checkbox"/> 65+        |                              |                                |
| Sex                                                             | <input type="checkbox"/> M     | <input type="checkbox"/> F     | <input type="checkbox"/> OTHER    |                                 |                                     |                              |                                |
| Years in general practice                                       | <input type="checkbox"/> <2    | <input type="checkbox"/> 2-5   | <input type="checkbox"/> 6-15     | <input type="checkbox"/> 16-25  | <input type="checkbox"/> 26+        |                              |                                |
| GP registrar?                                                   | <input type="checkbox"/> Y     | <input type="checkbox"/> N     |                                   |                                 |                                     |                              |                                |
| Average hours spend in clinical practice per week               | <input type="checkbox"/> <10   | <input type="checkbox"/> 11-20 | <input type="checkbox"/> 21-30    | <input type="checkbox"/> 31-40  | <input type="checkbox"/> >40        |                              |                                |
| Size of Practice (number of GPs)                                | <input type="checkbox"/> 1     | <input type="checkbox"/> 2-4   | <input type="checkbox"/> 5-9      | <input type="checkbox"/> 10-20  | <input type="checkbox"/> >20        |                              |                                |
| State/Territory of the Practice you work in                     | <input type="checkbox"/> NSW   | <input type="checkbox"/> VIC   | <input type="checkbox"/> QLD      | <input type="checkbox"/> SA     | <input type="checkbox"/> TAS        | <input type="checkbox"/> WA  | <input type="checkbox"/> ACT   |
| Geographical area serviced                                      | <input type="checkbox"/> METRO |                                | <input type="checkbox"/> REGIONAL |                                 | <input type="checkbox"/> REMOTE     |                              |                                |
| Did you attend the Women and Children's Health event this year? | <input type="checkbox"/> Y     | <input type="checkbox"/> N     |                                   |                                 |                                     |                              |                                |

|                                                                                                                        |                            |                            |                              |                               |                              |
|------------------------------------------------------------------------------------------------------------------------|----------------------------|----------------------------|------------------------------|-------------------------------|------------------------------|
|                                                                                                                        | <input type="checkbox"/> 0 | <input type="checkbox"/> 1 | <input type="checkbox"/> 2-5 | <input type="checkbox"/> 6-10 | <input type="checkbox"/> >10 |
| 1. In the past 3 months, how many of your patients have enquired about medicinal cannabis products?                    | <input type="checkbox"/>   | <input type="checkbox"/>   | <input type="checkbox"/>     | <input type="checkbox"/>      | <input type="checkbox"/>     |
|                                                                                                                        | <b>STRONGLY DISAGREE</b>   | <b>SLIGHTLY DISAGREE</b>   | <b>NEUTRAL</b>               | <b>SLIGHTLY AGREE</b>         | <b>STRONGLY AGREE</b>        |
| 2. I have patients who may benefit from medicinal cannabis                                                             | <input type="checkbox"/>   | <input type="checkbox"/>   | <input type="checkbox"/>     | <input type="checkbox"/>      | <input type="checkbox"/>     |
| 3. Medicinal cannabis products should be available on prescription now for certain indications                         | <input type="checkbox"/>   | <input type="checkbox"/>   | <input type="checkbox"/>     | <input type="checkbox"/>      | <input type="checkbox"/>     |
| 4. I feel comfortable discussing medicinal cannabis with my patients                                                   | <input type="checkbox"/>   | <input type="checkbox"/>   | <input type="checkbox"/>     | <input type="checkbox"/>      | <input type="checkbox"/>     |
| 5. I have good knowledge around the effects of medicinal cannabis products                                             | <input type="checkbox"/>   | <input type="checkbox"/>   | <input type="checkbox"/>     | <input type="checkbox"/>      | <input type="checkbox"/>     |
| 6. I am aware of the different medicinal cannabis products and formulations currently available                        | <input type="checkbox"/>   | <input type="checkbox"/>   | <input type="checkbox"/>     | <input type="checkbox"/>      | <input type="checkbox"/>     |
| 7. I would like the ability to prescribe medicinal cannabis products                                                   | <input type="checkbox"/>   | <input type="checkbox"/>   | <input type="checkbox"/>     | <input type="checkbox"/>      | <input type="checkbox"/>     |
| 8. Medicinal cannabis should only be prescribed by specialists                                                         | <input type="checkbox"/>   | <input type="checkbox"/>   | <input type="checkbox"/>     | <input type="checkbox"/>      | <input type="checkbox"/>     |
| 9. Medicinal cannabis should be provided in "shared care" with a specialist                                            | <input type="checkbox"/>   | <input type="checkbox"/>   | <input type="checkbox"/>     | <input type="checkbox"/>      | <input type="checkbox"/>     |
| 10. Only GPs who have undergone specific training and credentialing should be allowed to prescribe medicinal cannabis  | <input type="checkbox"/>   | <input type="checkbox"/>   | <input type="checkbox"/>     | <input type="checkbox"/>      | <input type="checkbox"/>     |
| 11. I know how to help patients legally access medicinal cannabis                                                      | <input type="checkbox"/>   | <input type="checkbox"/>   | <input type="checkbox"/>     | <input type="checkbox"/>      | <input type="checkbox"/>     |
| 12. I understand the current regulatory approach to medicinal cannabis                                                 | <input type="checkbox"/>   | <input type="checkbox"/>   | <input type="checkbox"/>     | <input type="checkbox"/>      | <input type="checkbox"/>     |
| 13. I understand the current RACGP position on medicinal cannabis                                                      | <input type="checkbox"/>   | <input type="checkbox"/>   | <input type="checkbox"/>     | <input type="checkbox"/>      | <input type="checkbox"/>     |
| 14. There is little difference between "street cannabis" and medicinal cannabis products                               | <input type="checkbox"/>   | <input type="checkbox"/>   | <input type="checkbox"/>     | <input type="checkbox"/>      | <input type="checkbox"/>     |
| 15. I will not prescribe medicinal cannabis as the risk of abuse and dependence is too high                            | <input type="checkbox"/>   | <input type="checkbox"/>   | <input type="checkbox"/>     | <input type="checkbox"/>      | <input type="checkbox"/>     |
| 16. I will not prescribe medicinal cannabis as the risk of side effects (other than abuse and dependence) is too high. | <input type="checkbox"/>   | <input type="checkbox"/>   | <input type="checkbox"/>     | <input type="checkbox"/>      | <input type="checkbox"/>     |
| 17. There is sufficient scientific evidence of the efficacy of medicinal cannabis                                      | <input type="checkbox"/>   | <input type="checkbox"/>   | <input type="checkbox"/>     | <input type="checkbox"/>      | <input type="checkbox"/>     |

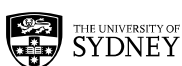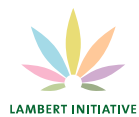

STRONGLY DISAGREE    SLIGHTLY DISAGREE    NEUTRAL    SLIGHTLY AGREE    STRONGLY AGREE

18 . I support the use of medicinal cannabis in patients with:

|    |                                                 |                          |                          |                          |                          |                          |
|----|-------------------------------------------------|--------------------------|--------------------------|--------------------------|--------------------------|--------------------------|
| 1  | <i>Chronic cancer pain</i>                      | <input type="checkbox"/> |
| 2  | <i>Chronic non-cancer pain</i>                  | <input type="checkbox"/> |
| 3  | <i>Neuropathic pain</i>                         | <input type="checkbox"/> |
| 4  | <i>Intractable epilepsy</i>                     | <input type="checkbox"/> |
| 5  | <i>Anti-tumour effects</i>                      | <input type="checkbox"/> |
| 6  | <i>Spasticity in Multiple Sclerosis</i>         | <input type="checkbox"/> |
| 7  | <i>Dementia patients with agitation</i>         | <input type="checkbox"/> |
| 8  | <i>Insomnia</i>                                 | <input type="checkbox"/> |
| 9  | <i>PTSD</i>                                     | <input type="checkbox"/> |
| 10 | <i>Anxiety</i>                                  | <input type="checkbox"/> |
| 11 | <i>Depression</i>                               | <input type="checkbox"/> |
| 12 | <i>End of life/Palliative care</i>              | <input type="checkbox"/> |
| 13 | <i>Chemotherapy-induced nausea and vomiting</i> | <input type="checkbox"/> |
| 14 | <i>Cachexia associated with severe illness</i>  | <input type="checkbox"/> |

19 . The major side effects of medicinal cannabis consumption include:

|    |                                             |                          |                          |                          |                          |                          |
|----|---------------------------------------------|--------------------------|--------------------------|--------------------------|--------------------------|--------------------------|
| 20 | <i>Addiction and dependence</i>             | <input type="checkbox"/> |
| 21 | <i>Cognitive impairment</i>                 | <input type="checkbox"/> |
| 22 | <i>Driving impairment</i>                   | <input type="checkbox"/> |
| 23 | <i>Weight gain</i>                          | <input type="checkbox"/> |
| 24 | <i>Psychosis</i>                            | <input type="checkbox"/> |
| 25 | <i>Other long-term mental health issues</i> | <input type="checkbox"/> |
| 26 | <i>Interactions with other medications</i>  | <input type="checkbox"/> |
| 27 | <i>Impact on the developing brain</i>       | <input type="checkbox"/> |

20 . Medicinal cannabis is generally more hazardous than:

|    |                             |                          |                          |                          |                          |                          |
|----|-----------------------------|--------------------------|--------------------------|--------------------------|--------------------------|--------------------------|
| 32 | <i>Prescription opioids</i> | <input type="checkbox"/> |
| 33 | <i>Benzodiazepines</i>      | <input type="checkbox"/> |
| 34 | <i>Antipsychotics</i>       | <input type="checkbox"/> |
| 35 | <i>Statins</i>              | <input type="checkbox"/> |
| 36 | <i>Chemotherapy drugs</i>   | <input type="checkbox"/> |
| 37 | <i>Antidepressants</i>      | <input type="checkbox"/> |

21 . The right to prescribe medicinal cannabis should be available to: **CHOOSE ONE RESPONSE ONLY**

|    |                                                                   |                          |
|----|-------------------------------------------------------------------|--------------------------|
| 42 | <i>All GPs</i>                                                    | <input type="checkbox"/> |
| 43 | <i>Only GPs with specific training and credentials</i>            | <input type="checkbox"/> |
| 44 | <i>Only GPs in 'shared care' with a specialist</i>                | <input type="checkbox"/> |
| 45 | <i>Only specialists</i>                                           | <input type="checkbox"/> |
| 46 | <i>Medicinal cannabis should not be available on prescription</i> | <input type="checkbox"/> |

**OPEN ENDED COMMENTS**

Please use this space to offer any comments, opinions or observations about medicinal cannabis in Australia

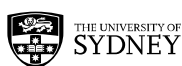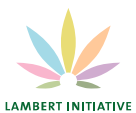

**STROBE 2007 (v4) Statement—Checklist of items that should be included in reports of *cross-sectional studies***

| Section/Topic                | Item # | Recommendation                                                                                                                                                                       | Reported on page # |
|------------------------------|--------|--------------------------------------------------------------------------------------------------------------------------------------------------------------------------------------|--------------------|
| Title and abstract           | 1      | (a) Indicate the study's design with a commonly used term in the title or the abstract                                                                                               | 1                  |
|                              |        | (b) Provide in the abstract an informative and balanced summary of what was done and what was found                                                                                  | 2                  |
| <b>Introduction</b>          |        |                                                                                                                                                                                      |                    |
| Background/rationale         | 2      | Explain the scientific background and rationale for the investigation being reported                                                                                                 | 4-5                |
| Objectives                   | 3      | State specific objectives, including any prespecified hypotheses                                                                                                                     | 5                  |
| <b>Methods</b>               |        |                                                                                                                                                                                      |                    |
| Study design                 | 4      | Present key elements of study design early in the paper                                                                                                                              | 5-6                |
| Setting                      | 5      | Describe the setting, locations, and relevant dates, including periods of recruitment, exposure, follow-up, and data collection                                                      | 5-7                |
| Participants                 | 6      | (a) Give the eligibility criteria, and the sources and methods of selection of participants                                                                                          | 5                  |
| Variables                    | 7      | Clearly define all outcomes, exposures, predictors, potential confounders, and effect modifiers. Give diagnostic criteria, if applicable                                             | 6-8                |
| Data sources/<br>measurement | 8*     | For each variable of interest, give sources of data and details of methods of assessment (measurement). Describe comparability of assessment methods if there is more than one group | 7                  |
| Bias                         | 9      | Describe any efforts to address potential sources of bias                                                                                                                            | 16                 |
| Study size                   | 10     | Explain how the study size was arrived at                                                                                                                                            | 6                  |
| Quantitative variables       | 11     | Explain how quantitative variables were handled in the analyses. If applicable, describe which groupings were chosen and why                                                         | NA                 |
| Statistical methods          | 12     | (a) Describe all statistical methods, including those used to control for confounding                                                                                                | 7-8                |
|                              |        | (b) Describe any methods used to examine subgroups and interactions                                                                                                                  | 7                  |
|                              |        | (c) Explain how missing data were addressed                                                                                                                                          | 6                  |
|                              |        | (d) If applicable, describe analytical methods taking account of sampling strategy                                                                                                   | NA                 |
|                              |        | (e) Describe any sensitivity analyses                                                                                                                                                | NA                 |

|                          |     |                                                                                                                                                                                                              |                                                                                      |
|--------------------------|-----|--------------------------------------------------------------------------------------------------------------------------------------------------------------------------------------------------------------|--------------------------------------------------------------------------------------|
| <b>Results</b>           |     |                                                                                                                                                                                                              |                                                                                      |
| Participants             | 13* | (a) Report numbers of individuals at each stage of study—eg numbers potentially eligible, examined for eligibility, confirmed eligible, included in the study, completing follow-up, and analysed            | 5, 7                                                                                 |
|                          |     | (b) Give reasons for non-participation at each stage                                                                                                                                                         | NA                                                                                   |
|                          |     | (c) Consider use of a flow diagram                                                                                                                                                                           | NA                                                                                   |
| Descriptive data         | 14* | (a) Give characteristics of study participants (eg demographic, clinical, social) and information on exposures and potential confounders                                                                     | 7-8                                                                                  |
|                          |     | (b) Indicate number of participants with missing data for each variable of interest                                                                                                                          | Percentage of valid responses stated for each categorical variable in tables/figures |
| Outcome data             | 15* | Report numbers of outcome events or summary measures                                                                                                                                                         | NA                                                                                   |
| Main results             | 16  | (a) Give unadjusted estimates and, if applicable, confounder-adjusted estimates and their precision (eg, 95% confidence interval). Make clear which confounders were adjusted for and why they were included | NA                                                                                   |
|                          |     | (b) Report category boundaries when continuous variables were categorized                                                                                                                                    | NA                                                                                   |
|                          |     | (c) If relevant, consider translating estimates of relative risk into absolute risk for a meaningful time period                                                                                             | NA                                                                                   |
| Other analyses           | 17  | Report other analyses done—eg analyses of subgroups and interactions, and sensitivity analyses                                                                                                               | NA                                                                                   |
| <b>Discussion</b>        |     |                                                                                                                                                                                                              |                                                                                      |
| Key results              | 18  | Summarise key results with reference to study objectives                                                                                                                                                     | 12-13                                                                                |
| Limitations              | 19  | Discuss limitations of the study, taking into account sources of potential bias or imprecision. Discuss both direction and magnitude of any potential bias                                                   | 15                                                                                   |
| Interpretation           | 20  | Give a cautious overall interpretation of results considering objectives, limitations, multiplicity of analyses, results from similar studies, and other relevant evidence                                   | 15                                                                                   |
| Generalisability         | 21  | Discuss the generalisability (external validity) of the study results                                                                                                                                        | 15                                                                                   |
| <b>Other information</b> |     |                                                                                                                                                                                                              |                                                                                      |
| Funding                  | 22  | Give the source of funding and the role of the funders for the present study and, if applicable, for the original study on which the present article is based                                                | 16                                                                                   |

\*Give information separately for cases and controls in case-control studies and, if applicable, for exposed and unexposed groups in cohort and cross-sectional studies.

1  
2  
3  
4 **Note:** An Explanation and Elaboration article discusses each checklist item and gives methodological background and published examples of transparent reporting. The STROBE  
5 checklist is best used in conjunction with this article (freely available on the Web sites of PLoS Medicine at <http://www.plosmedicine.org/>, Annals of Internal Medicine at  
6 <http://www.annals.org/>, and Epidemiology at <http://www.epidem.com/>). Information on the STROBE Initiative is available at [www.strobe-statement.org](http://www.strobe-statement.org).  
7  
8  
9  
10  
11  
12  
13  
14  
15  
16  
17  
18  
19  
20  
21  
22  
23  
24  
25  
26  
27  
28  
29  
30  
31  
32  
33  
34  
35  
36  
37  
38  
39  
40  
41  
42  
43  
44  
45  
46  
47

For peer review only



# BMJ Open

## Knowledge and attitudes of Australian general practitioners towards medicinal cannabis: a cross-sectional survey

|                                 |                                                                                                                                                                                                                                                                                                                                                                                                                                   |
|---------------------------------|-----------------------------------------------------------------------------------------------------------------------------------------------------------------------------------------------------------------------------------------------------------------------------------------------------------------------------------------------------------------------------------------------------------------------------------|
| Journal:                        | <i>BMJ Open</i>                                                                                                                                                                                                                                                                                                                                                                                                                   |
| Manuscript ID                   | bmjopen-2018-022101.R1                                                                                                                                                                                                                                                                                                                                                                                                            |
| Article Type:                   | Research                                                                                                                                                                                                                                                                                                                                                                                                                          |
| Date Submitted by the Author:   | 05-Apr-2018                                                                                                                                                                                                                                                                                                                                                                                                                       |
| Complete List of Authors:       | Karanges, Emily; The University of Sydney, The Lambert Initiative for Cannabinoid Therapeutics<br>Suraev, Anastasia; The University of Sydney, The Lambert Initiative for Cannabinoid Therapeutics<br>Elias, Natalie; The University of Sydney, The Lambert Initiative for Cannabinoid Therapeutics<br>Manocha, Ramesh; Healthed<br>McGregor, Iain; The University of Sydney, The Lambert Initiative for Cannabinoid Therapeutics |
| <b>Primary Subject Heading</b>: | General practice / Family practice                                                                                                                                                                                                                                                                                                                                                                                                |
| Secondary Subject Heading:      | Health services research, General practice / Family practice, Medical education and training                                                                                                                                                                                                                                                                                                                                      |
| Keywords:                       | PRIMARY HEALTH CARE, MEDICINAL CANNABIS, THERAPEUTICS, ATTITUDE                                                                                                                                                                                                                                                                                                                                                                   |
|                                 |                                                                                                                                                                                                                                                                                                                                                                                                                                   |

SCHOLARONE™  
Manuscripts

1  
2  
3 **Knowledge and attitudes of Australian general practitioners towards medicinal cannabis: a**  
4  
5 **cross-sectional survey**  
6  
7

8  
9 Iain McGregor

10  
11 The Lambert Initiative for Cannabinoid Therapeutics

12  
13 The University of Sydney

14  
15 Level 6, Building M02F, Brain and Mind Centre,

16  
17 94 Mallet St, Camperdown, NSW, 2050

18  
19 [iain.mcgregor@sydney.edu.au](mailto:iain.mcgregor@sydney.edu.au)  
20  
21

22  
23 Emily A Karanges<sup>1</sup>

24  
25 Anastasia S Suraev<sup>1</sup>

26  
27 Natalie Elias<sup>1</sup>

28  
29 Ramesh Manocha<sup>2</sup>

30  
31 Iain S McGregor<sup>1</sup>  
32  
33  
34

35 <sup>1</sup>The Lambert Initiative for Cannabinoid Therapeutics, The University of Sydney, Sydney,  
36 Australia

37  
38 <sup>2</sup>Healthed, Sydney, Australia  
39  
40  
41  
42

43 Emily A Karanges and Anastasia S Suraev contributed equally to this paper.  
44  
45  
46  
47  
48  
49

50 Word count: 3,681 (excl. tables, references and figure captions)  
51  
52  
53  
54  
55  
56  
57  
58  
59  
60

## Abstract

**Objectives:** To examine the knowledge and attitudes of Australian general practitioners (GPs) towards medicinal cannabis, including patient demand, GP perceptions of therapeutic effects and potential harms, perceived knowledge and willingness to prescribe.

**Design, setting and participants:** A cross-sectional survey completed by 640 GPs (response rate = 37%) attending multiple topic educational seminars in five major Australian cities between August and November 2017.

**Main outcome measures:** Number of patients enquiring about medicinal cannabis, perceived knowledge of GPs, conditions where GPs perceived it to be beneficial, willingness to prescribe, preferred models of access, perceived adverse effects, and safety relative to other prescription drugs.

**Results:** The majority of GPs (61.5%) reported one or more patient enquiry about medicinal cannabis in the last 3 months. Most felt that their own knowledge was inadequate and only 28.8% felt comfortable discussing medicinal cannabis with patients. Over half (56.5%) supported availability on prescription, with the preferred access model involving trained GPs prescribing independently of specialists. Support for use of medicinal cannabis was condition-specific, with strong support for use in cancer pain, palliative care and epilepsy, and much lower support for use in depression and anxiety.

**Conclusions:** The majority of GPs are supportive or neutral with regards to medicinal cannabis use. Our results highlight the need for improved training of GPs around medicinal cannabis, and the discrepancy between GP-preferred models of access and the current specialist-led models.

## Article Summary

### Strengths and limitations of this study

- This is the first study to have examined the attitudes and knowledge of Australian general practitioners (GPs) about medicinal cannabis.
- The study was performed across five major cities in Australia and included a relatively large sample (n=640) of GPs.
- Limitations include utilising a survey without established psychometric properties and exclusive recruitment of self-selected GPs from educational seminars who were motivated to complete a survey on medicinal cannabis.

## INTRODUCTION

There is strong and increasing public support for the use of medicinal cannabis in Australia.[1] This support has been a driver of a number of legislative and policy changes enacted over the last two years. These changes have allowed approved companies to cultivate cannabis plants and manufacture cannabis products, and have facilitated legal access to medicinal cannabis for approved patients.[2]

Despite this, patient access remains complex and highly restricted. Doctors wishing to prescribe medicinal cannabis products must either apply to become authorised prescribers for a class of patients, or apply for access for individual patients under the “Special Access Scheme Category B (SAS-B)”[3] via the Therapeutic Goods Administration (TGA), a regulatory body for therapeutic goods in Australia. Parallel approvals are also usually required from the relevant State or Territory Department of Health. Even with these approvals in place, patients often find available products prohibitively expensive. Moreover, no formal educational training programs for doctors on the topic of medicinal cannabis have been initiated since the recent legislative changes.

Consequently, few doctors and patients are accessing medicinal cannabis in Australia. Currently, there are only about 31 authorised prescribers, servicing around 100 patients, with a further 386 patients granted access via SAS-B approvals (TGA, personal communication, March 2018). This contrasts with the more mature access schemes of countries such as Canada, where approximately 200,000 patients are serviced.[4]

1  
2  
3 Under current schemes, Australian GPs are typically only permitted to prescribe medicinal  
4 cannabis if supported by a specialist.[3] Nonetheless, GPs are generally the first point of contact  
5 for patients enquiring about, or seeking access to, medicinal cannabis. Australian medical  
6 bodies have forecasted that patient demand for medicinal cannabis is set to increase.[5] With  
7 ongoing media coverage fuelling unrealistic patient expectations regarding therapeutic efficacy  
8 and cannabis access,[6] GPs may be forced into the role of gatekeepers despite having limited  
9 knowledge and training in the field.  
10  
11  
12  
13  
14  
15  
16  
17  
18  
19  
20

21 The attitudes of Australian GPs towards medicinal cannabis are unknown. Statements from  
22 peak medical bodies such as the Royal Australasian College of Physicians (RACP) [7], Australian  
23 Medical Association (AMA), and the Australian and New Zealand College of Anaesthetists'  
24 (ANZCA) Faculty of Pain Management generally advise caution on the basis of limited evidence  
25 for efficacy and safety.[5,8-10] Surveys from other countries suggest that clinicians are  
26 generally more reticent toward medicinal cannabis than the general public, particularly in the  
27 United States,[11,12] with concerns centred on limited evidence for efficacy and adverse  
28 effects, including abuse and dependence.[11-13] Nevertheless, recent analyses suggest that the  
29 majority of GPs and specialists internationally support the use of medicinal cannabis for specific  
30 conditions.[14]  
31  
32  
33  
34  
35  
36  
37  
38  
39  
40  
41  
42  
43  
44  
45

46 This article describes the results of a survey of Australian GPs around medicinal cannabis  
47 issues, including their clinical experiences, perceived knowledge, and beliefs about its  
48 regulation, safety, indications for use, and the preferred role of GPs in its prescription.  
49  
50  
51  
52  
53  
54  
55  
56  
57  
58  
59  
60

## METHODS

Printed surveys were distributed at one-day general practice educational seminars held in five major Australian cities (Sydney, Melbourne, Brisbane, Adelaide, and Perth) between August and November 2017. All GPs and GP registrars were eligible to participate (n = 1728). Seminars covered a range of topics relevant to general practice with around 18 different topics covered on the day in consecutive 20 - 30 minute presentations. GPs and GP registrars received professional education points for attending the seminars. One of the authors (ISM) spoke on the topic of medicinal cannabis at each event, but surveys were completed and collected prior to this presentation. During the opening of each *Healthed* seminar, participants were informed that the survey and its information and consent form were located in their conference satchel. Participants were instructed to turn in their surveys, before afternoon tea, into drop boxes at the conference.

The survey was devised specifically for use in this study, and thus, had not been psychometrically validated. Questions were reviewed by an advisory group of GPs to ensure appropriate wording and clarity (see Supplementary Material online for copy of full survey). Participants first completed a series of closed questions on demographics, vocational experience (years in practice, registrar status, hours per week), and practice characteristics (size, state/territory, geographical classification). The survey proper consisted of 46 items on topics related to medicinal cannabis including clinical experience (4 items); perceived knowledge (5 items); concerns and awareness about safety and efficacy (18 items); appropriate indications for use (14 items); and views on the role of GPs, and specialists in its prescribing (5 items).

1  
2  
3 Participants rated the extent to which they agreed with 44 statements on a 5-point Likert  
4 scale (1 = strongly disagree; 5 = strongly agree). There were also two multiple-choice questions  
5  
6 concerning patient demand and prescribing preferences (role of GPs/specialists). The latter  
7  
8 question was only introduced after the first seminar (included in 73% of completed surveys;  
9  
10 excludes respondents from the Sydney event). A space for open-ended comments was provided  
11  
12 at the end of the survey. The study was approved by The University of Sydney Human Research  
13  
14 Ethics Committee (2017/692).  
15  
16  
17  
18  
19  
20

21 Results were summarised using descriptive statistics (frequency, percentage of valid  
22 responses). Likert scale responses were generally collapsed into three categories: Agree,  
23  
24 Neutral, and Disagree. Open-ended comments were reviewed for common themes. A  
25  
26 composite score for Perceived Knowledge was created by summing scores from five  
27  
28 knowledge-related questions. Age, sex, and perceived knowledge were tested as potential  
29  
30 predictors of views on medicinal cannabis availability ('medicinal cannabis should currently be  
31  
32 available on prescription for certain indications'; 1 = strongly disagree to 5 = strongly agree)  
33  
34 using separate ordinal logistic regression analyses. Chi-square tests were used to compare the  
35  
36 demographic characteristics of our sample to the Australian population of GPs.[15]  
37  
38  
39  
40  
41  
42  
43

44 One section of the questionnaire asked whether GPs support the use of medicinal cannabis  
45  
46 in 14 different medical conditions. To assess whether their support was consistent with current  
47  
48 evidence for efficacy, each indication was categorised as having either "Good Evidence for  
49  
50 Efficacy" (spasticity in MS, intractable epilepsy, chronic cancer pain, chronic non-cancer pain,  
51  
52 neuropathic pain, CINV, and insomnia) or "Poor Evidence for Efficacy" (anxiety, depression,  
53  
54 PTSD, cachexia, cancer/ anti-tumour effects, agitation in dementia) based on two recent  
55  
56  
57  
58  
59  
60



1  
2  
3 authoritative reviews,[16,17] and levels of support expressed compared to this evidence base.  
4  
5 The evidence for 'palliative care' was not assessed in either review and was thus excluded for  
6  
7 the purposes of this analysis. Further, GP respondents were categorised as having either "Good  
8  
9 Perceived Knowledge" or "Poor Perceived Knowledge" using a cut-off score of 15 on the  
10  
11 composite score for Perceived Knowledge (the midpoint between the lowest (=5) and highest  
12  
13 (=25) possible scores for the 5 questions relating to self-knowledge). Chi-square tests were used  
14  
15 to assess whether GPs with Good Perceived Knowledge expressed greater support for specific  
16  
17 indications than those with Poor Perceived Knowledge. Bonferroni correction were used to  
18  
19 control for these multiple comparisons.  
20  
21  
22  
23  
24  
25

26 Analyses were conducted using IBM SPSS Statistics for Windows, version 24.0 (IBM Corp.,  
27  
28 Armonk, N.Y., USA), and graphs were created using GraphPad Prism version 7.02 for Windows  
29  
30 (GraphPad Software, La Jolla, California, USA).  
31  
32  
33

### 34 **Patient and Public Involvement**

35  
36 Patients were not involved in this study.  
37  
38

## 39 **RESULTS**

### 40 41 42 **Demographic data**

43  
44 Demographic and practice details of the 640 participants are shown in Table 1. The majority  
45  
46 of participants were female (67.3%), aged between 35 and 64 years (77.5%), and residing in  
47  
48 Victoria (30.3%) and New South Wales (27.5%). Over half of respondents had been practicing  
49  
50 for >15 years (56.7%), worked >30 hours/week (63.4%), and serviced metropolitan areas  
51  
52 (60.3%). Only 8.2% were in single-GP practices and 7.9% were registrars.  
53  
54  
55  
56  
57  
58  
59  
60

**Table 1. Demographic and practice characteristics of GPs in this study, and all GPs in Australia.**

|                                    | GP survey (n = 640) |         | Australia<br>(n = 34,606) [15] | p (X <sup>2</sup> test) |
|------------------------------------|---------------------|---------|--------------------------------|-------------------------|
|                                    | n                   | Valid % | %                              |                         |
| <b>Age (n = 640)</b>               |                     |         |                                | <0.001                  |
| <35                                | 57                  | 8.9     | 13.4                           |                         |
| 35-44                              | 134                 | 20.9    | 24.9                           |                         |
| 45-54                              | 177                 | 27.7    | 24.9                           |                         |
| 55-64                              | 185                 | 28.9    | 23.1                           |                         |
| 65+                                | 87                  | 13.6    | 13.7                           |                         |
| <b>Sex (n = 636)</b>               |                     |         |                                | <0.001                  |
| Female                             | 428                 | 67.3    | 44.7                           |                         |
| <b>GP registrar (n = 611)</b>      |                     |         |                                | 0.08                    |
| Yes                                | 48                  | 7.9     | 10.0                           |                         |
| <b>State/territory (n = 627)</b>   |                     |         |                                | 0.001                   |
| New South Wales                    | 175                 | 27.9    | 30.6                           |                         |
| Victoria                           | 193                 | 30.8    | 24.1                           |                         |
| Queensland                         | 129                 | 20.6    | 21.7                           |                         |
| South Australia                    | 81                  | 12.9    | 7.8                            |                         |
| Western Australia                  | 39                  | 6.2     | 10.2                           |                         |
| <b>Geographical area (n = 611)</b> |                     |         |                                | 0.01                    |
| Metropolitan                       | 381                 | 62.4    | 68.2                           |                         |
| Regional                           | 206                 | 33.7    | 28.0                           |                         |
| Remote                             | 24                  | 3.9     | 3.9                            |                         |
| <b>Years as GP (n = 637)</b>       |                     |         |                                |                         |
| <2                                 | 38                  | 6.0     |                                |                         |
| 2-5                                | 90                  | 14.1    |                                |                         |
| 6-15                               | 148                 | 23.2    |                                |                         |
| 16-25                              | 136                 | 21.4    |                                |                         |
| 26+                                | 225                 | 35.3    |                                |                         |

### Experience, practice and general attitudes

A majority of GPs (61.5%) had experienced at least one patient enquiry regarding medicinal cannabis in the prior three months, with 7.5% reporting more than five enquiries. When considering GPs working >30 hours/week, the proportion with at least one enquiry increased to 69.0% and 11.8% received more than five enquiries (Table 2).

**Table 2. Reported number of patient enquiries about medicinal cannabis in the prior three months, for all respondents and those working over 30 hours per week, on average.**

| Number of patients enquiring | All respondents (n = 615) |      | Respondents >30 h/week (n = 391) |      |
|------------------------------|---------------------------|------|----------------------------------|------|
|                              | N                         | %    | N                                | %    |
| 0                            | 237                       | 38.5 | 116                              | 31.0 |
| 1                            | 159                       | 25.9 | 90                               | 24.1 |
| 2-5                          | 173                       | 28.1 | 124                              | 33.2 |
| 6-10                         | 33                        | 5.4  | 32                               | 8.6  |
| >10                          | 13                        | 2.1  | 12                               | 3.2  |

More than half of GPs agreed with the statement that medicinal cannabis should currently be available on prescription for certain indications (strongly agree: 19.6%, n = 125/637; slightly agree: 36.9%), while 14.9% disagreed (Figure 1). GPs were more likely to agree if they were older ( $\chi^2(4) = 25.63$ ,  $p < 0.001$ ) and had greater perceived knowledge ( $\chi^2(2) = 5.54$ ,  $p = 0.02$ ), but there was no difference between sexes ( $\chi^2(1) = 2.55$ ,  $p = 0.11$ ).

More GPs agreed that they had patients who would benefit from medicinal cannabis (44.0%, n = 280/636) than disagreed (21.4%), with 34.6% expressing a neutral opinion (Figure 1). Conversely, fewer respondents agreed that they would like to be able to prescribe medicinal

1  
2  
3 cannabis (28.9%, n = 183/633) than disagreed (33.8%), again with a high number of neutral  
4  
5 responses. Approximately half of respondents (n = 51.9%; n = 328/632) did not feel comfortable  
6  
7 discussing medicinal cannabis with their patients.  
8  
9

### 10 11 **Perceived knowledge**

12  
13  
14 GPs generally rated their knowledge of medicinal cannabis as poor (Figure 2). On all five  
15  
16 knowledge-related items, over two-thirds of respondents disagreed that they had knowledge of  
17  
18 the topic in question. Notably, 65.4% (n = 417/638) 'strongly disagreed' that they knew how to  
19  
20 access medicinal cannabis for patients, and more than half 'strongly disagreed' that they knew  
21  
22 about available products (55.5%, n = 354/638) or the current regulatory approach (57.8%, n =  
23  
24 370/630). According to their own self-ratings, 543 (86%) GPs had Poor Perceived Knowledge  
25  
26 (<15/25 composite score) while 88 (14%) GPs were categorised as having Good Perceived  
27  
28 Knowledge (≥15/25 composite score).  
29  
30  
31  
32  
33

34  
35 Respondents were more likely to endorse an access model permitting prescribing by  
36  
37 trained and accredited GPs (78.6% agree, n = 503/640), or by GPs in a 'shared care'  
38  
39 arrangement with a specialist (63.2%, n = 401/634) than specialist-only prescribing (44.6%, n =  
40  
41 283/634). When asked to choose one preferred model, 41.2% (n = 164/398; note this question  
42  
43 was not included in the survey used at the first seminar in Sydney) indicated trained GPs as  
44  
45 their preferred prescriber, followed by shared care (29.6%). Specialist-only prescribing was  
46  
47 preferred by 14.6% of respondents, while only 12.1% preferred that all GPs have the right to  
48  
49 prescribe, regardless of training.  
50  
51  
52  
53  
54  
55  
56  
57  
58  
59  
60

### Indications for use and evidence for efficacy

Almost half of respondents (48.0%, n = 305/635) were neutral as to whether there was sufficient overall scientific evidence for the efficacy of medicinal cannabis, with 22.8% supporting the statement. Those who agreed that medicinal cannabis should be available on prescription had higher endorsement of the statement than those who disagreed (40.2% versus 11.7%). GPs supported the use of medicinal cannabis in chronic cancer pain (80.2% agree, n = 506/631), palliative care (78.8%, n = 494/627), and intractable epilepsy (70.3%, n = 441/627; Figure 3). Use in chronic non-cancer pain and neuropathic pain was endorsed by only 39.1% (n = 246/629), and 38.3% (n = 241/630) of respondents respectively, with a high degree of neutrality. Less than 15% of GPs supported use in anxiety, insomnia or depression with a majority of GPs declining to support use in these conditions (Figure 3).

GPs with Good Perceived Knowledge of medicinal cannabis were more likely to support its use in neuropathic pain (52.9%) and chronic non-cancer pain (54%) than GPs with Poor Perceived Knowledge (35.6% and 36.4%, respectively) (neuropathic pain,  $\chi^2$  (2, N=620) = 9.9,  $p=0.007$ ; chronic non-cancer pain,  $\chi^2$  (2, N=620) = 11.2,  $p=0.004$ ). No other significant differences between GPs perceived knowledge level and their support for specific medical conditions were identified.

### Perceived features and adverse effects of medicinal cannabis

Approximately two-thirds of respondents disagreed with the statement that medicinal cannabis was no different to street cannabis (43.9% strongly disagree; n = 271/640; 20.5% slightly disagree), while 14.4% agreed.

1  
2  
3 The side effects of medicinal cannabis endorsed by more than half of respondents included  
4 driving impairment (64.9% agree, n = 408/629), adverse effects on the developing brain (58.4%,  
5 n = 366/627), cognitive impairment (56.5%, n = 356/630), and addiction and dependence  
6 (56.3%, n = 353/627); psychosis was endorsed by 49.9% (n = 313/627).  
7  
8  
9  
10  
11

12  
13 Overall, 27.7% of respondents (n = 177/637) agreed that they would not prescribe  
14 medicinal cannabis due to the risk of abuse and dependence, and 19.8% (n = 127/638) due to  
15 other side effects. These proportions were higher among GPs who disagreed with the  
16 availability of medicinal cannabis on prescription (58.1% and 44.2% respectively) and among  
17 those who disagreed that they would like to prescribe medicinal cannabis (47.6% and 34.6%  
18 respectively).  
19  
20  
21  
22  
23  
24  
25  
26  
27  
28

29 A high proportion of GPs were neutral with respect to whether medicinal cannabis was  
30 more hazardous than other prescription medicines (range: 43.7% to 51.3%; Figure 4). Of the  
31 remaining responses, a majority believed that medicinal cannabis was safer than chemotherapy  
32 drugs (78.1%, n = 278/356), opioid analgesics (75.6%, n = 248/328), benzodiazepines (74.5%, n  
33 = 248/333) and antipsychotics (68.3%, n = 209/306), and over 50% for antidepressants and  
34 statins.  
35  
36  
37  
38  
39  
40  
41  
42  
43

#### 44 **Open-ended responses**

45  
46  
47 Of the 156 open-ended responses, 48.1% concerned the participant's lack of knowledge  
48 about medicinal cannabis and/or the desire for training. Other common themes included the  
49 need for more evidence of efficacy (n = 18) and concerns about harms (n = 19), namely abuse  
50  
51  
52  
53  
54  
55  
56  
57  
58  
59  
60

1  
2  
3 and dependence (n =10), cannabis-seeking for recreational use (n = 5), repeating mistakes  
4  
5 made with opioids/benzodiazepines (n = 6) and other side effects (n = 4).  
6  
7

## 8 9 **DISCUSSION**

10  
11 To our knowledge, this is the first study of the experiences, attitudes and knowledge of  
12  
13 Australian GPs regarding medicinal cannabis. The survey demonstrates that many GPs have  
14  
15 fielded recent enquiries about medicinal cannabis from their patients, yet half were not  
16  
17 comfortable dealing these enquiries and most felt poorly informed about medicinal cannabis  
18  
19 and its current availability, regulation and uses. This perceived lack of knowledge was strongly  
20  
21 conveyed in the open-ended comments, as well as broadly reflected in the large number of  
22  
23 neutral responses to questions regarding therapeutic and adverse effects.  
24  
25  
26  
27

28  
29 In agreement with clinician surveys in the United States,[11,12] Australian GPs were  
30  
31 somewhat conservative in their attitudes about medicinal cannabis: only about half agreed that  
32  
33 medicinal cannabis should be available on prescription compared to approximately 85% of the  
34  
35 general Australian population.[1] This rate however has somewhat risen since previous surveys,  
36  
37 with just under 30% of Australian GPs reporting that cannabis should be available for medicinal  
38  
39 purposes in 2012.[18] This suggests a possible shift in attitudes over time as increasing  
40  
41 community support has driven a number of legislative and policy changes for greater patient  
42  
43 access and clinical trials in Australia. In the present survey, GPs were generally more supportive  
44  
45 of use of medicinal cannabis in conditions with a stronger evidence-base (such as spasticity in  
46  
47 multiple sclerosis, chemotherapy-induced nausea/vomiting) and/or where few effective  
48  
49 alternatives exist (palliative care, cancer pain, intractable epilepsy).[16] This also aligns with the  
50  
51  
52  
53  
54  
55  
56  
57  
58  
59  
60

1  
2  
3 indications for use suggested by various state governments.[19,20] By contrast, less than 40%  
4  
5 of all GPs supported use of medicinal cannabis in chronic non-cancer pain. This may reflect the  
6  
7 mixed findings regarding efficacy for this indication,[16,21] concerns about inappropriate use,  
8  
9 particularly in light of the problems associated with prescription opioids,[22] and the lack of  
10  
11 endorsement by Australian government and medical organisations.[10,19] Similarly, concerns  
12  
13 about limited evidence for efficacy, risk of worsening illness, and inappropriate use may  
14  
15 underlie the very low support for use in depression, anxiety and insomnia.[16,19] It is  
16  
17 somewhat troubling that these latter indications were among the most common reasons for  
18  
19 illegal use of cannabis for medicinal purposes in a survey of more than 1700 current users in the  
20  
21 Australian community (Lintzeris *et al*, in press).  
22  
23  
24  
25  
26

27  
28 Although GPs exhibited responses that suggested at least some familiarity with the  
29  
30 scientific and clinical literature, perceived knowledge about the effects, products and process of  
31  
32 accessing medicinal cannabis was generally very low. Less than 10% of GPs in our survey  
33  
34 reported understanding the current regulations concerning medicinal cannabis or how it can be  
35  
36 accessed for patients. It is well known that poor knowledge and low levels of comfort discussing  
37  
38 issues with patients are barriers to optimal patient care.[12,23] Provision of continuing medical  
39  
40 education and guidelines on the regulatory, pharmacological and clinical aspects of medicinal  
41  
42 cannabis are vital for equipping GPs to manage patients effectively.  
43  
44  
45  
46  
47

48 One surprising aspect of this survey was how GPs rated medicinal cannabis relative to other  
49  
50 common classes of prescription medicines. Of those expressing a non-neutral opinion  
51  
52 (approximately 50%), about three-quarters rated medicinal cannabis as less harmful than  
53  
54 opioids and benzodiazepines, and notably, just over half rated it less harmful than  
55  
56  
57  
58  
59  
60



1  
2  
3 antidepressants and statins. This perception of the relative safety of medicinal cannabis  
4 compared to opioids and benzodiazepines may reflect its negligible rate of mortality and  
5 relatively mild dependence and withdrawal syndrome.[24] Nonetheless, cannabis can clearly  
6 produce dependence; recent estimates suggest that there are over 45,000 treatment episodes  
7 each year for Australians seeking control over their cannabis use.[25] Concerns about abuse,  
8 misuse and dependence was an identified theme of the open-ended comments in our survey.  
9 Moreover, almost half of the GPs who did not want to be able to prescribe cannabis cited the  
10 risk of abuse and dependence as a primary concern.  
11  
12  
13  
14  
15  
16  
17  
18  
19  
20  
21  
22

23 Although there was a high degree of neutrality with respect to the desire of GPs to  
24 prescribe medicinal cannabis, the vast majority supported a model of prescribing in which GPs  
25 played a significant role. A model in which trained, accredited GPs could prescribe without  
26 specialist input received the strongest support, followed by GP prescribing in a 'shared care'  
27 arrangement with a specialist. This contrasts with the current model in Australia, where  
28 prescribing is conducted by specialists, although shared care arrangements are theoretically  
29 possible.[3] Although specialist-only prescribing may provide greater restrictions on use, the  
30 extension of prescribing rights to appropriately trained GPs arguably enables more holistic  
31 patient care, more frequent monitoring, better detection of adverse effects, and more timely  
32 treatment.[26] It is notable that GPs are empowered to prescribe, or permit access to,  
33 medicinal cannabis products in countries such as Canada and the United States,[12,23,27] and  
34 the Royal Australian College of GPs (RACGP) recently updated their position statement to  
35 explicitly endorse a direct role for GPs in medicinal cannabis access.[28]  
36  
37  
38  
39  
40  
41  
42  
43  
44  
45  
46  
47  
48  
49  
50  
51  
52  
53  
54  
55  
56  
57  
58  
59  
60

1  
2  
3 The strength of the study is the unique nature of the survey and the relatively large  
4 sample size enabled by accessing the GPs attending popular educational events. While our  
5 response rate of 37% appears relatively low, it exceeds typical published response rates of GP  
6 surveys.[29] Limitations include the sole recruitment of self-selected GPs from *Healthed*  
7 seminars, reliance on self-report of service provision, and utilising a survey without established  
8 psychometric properties. Furthermore, the survey respondents differed on a number of  
9 demographic and practice characteristics to the general population of GPs in Australia,  
10 suggestive of a non-representative sample. For instance, there was a disproportionate  
11 representation of female GPs in our study, which may be due to a tendency for greater survey  
12 response from females relative to males in general.[30] Finally, the findings cannot be  
13 generalised to other countries such as the United States and Canada, among others, where  
14 access to medicinal cannabis is not so strictly regulated.

15  
16  
17  
18  
19  
20  
21  
22  
23  
24  
25  
26  
27  
28  
29  
30  
31  
32  
33 In conclusion, our results demonstrate guarded support for medicinal cannabis  
34 availability among Australian GPs, but very low levels of perceived knowledge. Clearly, there is  
35 an urgent need for improved training of GPs around medicinal cannabis, and, in the future, a  
36 reconsideration of the role of GPs in its prescription.  
37  
38  
39  
40  
41  
42  
43  
44  
45  
46  
47  
48  
49  
50  
51  
52  
53  
54  
55  
56  
57  
58  
59  
60

## Acknowledgements

The authors gratefully acknowledge the contribution of *HealthEd* seminar organisers, who assisted with recruitment, printed and administered the questionnaires. We thank Dr Michael Bowen for assistance with statistical analysis.

## Funding statement

This work was supported by The Lambert Initiative for Cannabinoid Therapeutics at The University of Sydney. ISM is a National Health and Medical Research Council (NHMRC) of Australia Principal Research Fellowship.

## Competing Interests

This study was supported by the Lambert Initiative for Cannabinoid Therapeutics, a philanthropically-funded centre for medicinal cannabis research at the University of Sydney. Iain McGregor is Academic Director of the Lambert Initiative and an NHMRC Principal Research Fellow and receives research funding from the ARC and NHMRC. He is involved in an NHMRC-funded clinical trial using the cannabis extract, Nabiximols (*Sativex*). This survey was conducted at seminars run by *HealthEd*. Ramesh Manocha is the CEO of *HealthEd*, and Iain McGregor received honoraria and travel expenses from *HealthEd* for lectures conducted at these events. All other authors have no competing interests to declare.

### Author contributions

R.M., I.S.M., E.A.K., A.S., and N.E. conceived the study; I.S.M. collected the data; E.A.K., A.S., and I.S.M. conducted the data analysis and wrote the manuscript; All authors reviewed the manuscript.

### Ethics approval

Ethical approval for the survey was granted by The University of Sydney Human Research Ethics Committee [2017/692].

### Data sharing statement

No additional data are available.

## References

1. Australian Institute of Health and Welfare. National Drug Strategy Household Survey 2016: Detailed findings. (Drug Statistics series no. 31. Cat. no. PHE 214.). Canberra: AIHW; 2017. <https://www.aihw.gov.au/getmedia/15db8c15-7062-4cde-bfa4-3c2079f30af3/21028.pdf.aspx?inline=true> (accessed Nov 2017).
2. Therapeutic Goods Administration. Medicinal cannabis products: overview of regulation. Canberra: TGA; 2017. <https://www.tga.gov.au/medicinal-cannabis-products-overview-regulation> (accessed Nov 2017).
3. Therapeutic Goods Administration. Access to medicinal cannabis products: steps to using access schemes. Canberra: TGA; 2017. <https://www.tga.gov.au/access-medicinal-cannabis-products-steps-using-access-schemes> (accessed Dec 2017).
4. Health Canada. Market Data. Cannabis for Medical Purposes (FY 2017-18) - Licensed Producers: Monthly Data Ontario: Health Canada; 2017. <https://www.canada.ca/en/health-canada/services/drugs-health-products/medical-use-marijuana/licensed-producers/market-data.html> (accessed Nov 2017).
5. Royal Australian College of General Practitioners. RACGP Position statement: Medicinal use of cannabis products. Melbourne: RACGP; 2016. <https://www.racgp.org.au/support/policies/clinical-and-practice-management/racgp-position-statement-medicinal-use-of-cannabis-products/> (accessed Oct 2017).
6. Gates P, Todd S, Copeland J. Survey of Australian's knowledge, perception and use of cannabis for medicinal purposes. *J Addict Prev* 2017;5(1):10.
7. Martin, J. H., Bonomo, Y., & Reynolds, A. D. (2018). Compassion and evidence in prescribing cannabinoids: a perspective from the Royal Australasian College of Physicians. *MJA*, 208(3), 107-109.
8. Bartone T. Medicinal cannabis - still a lot of misinformation. Barton, ACT: Australian Medical Association; 2017. <https://ama.com.au/ausmed/medicinal-cannabis-%E2%80%93-still-lot-misinformation> (accessed Oct 26 2017).
9. Johnson C. Green light for medicinal cannabis but AMA says proceed with caution. *Aus Med* 2017;29(3):9.
10. Faculty of Pain Medicine. Statement on "Medicinal Cannabis" with particular reference to its use in the management of patients with chronic non-cancer pain. Melbourne: Australian and New

- 1  
2  
3 Zealand College of Anaesthetists Faculty of Pain Medicine; 2015.  
4 <http://fpm.anzca.edu.au/documents/pm10-april-2015.pdf> (accessed Nov 2017).  
5  
6  
7 11. Charuvastra A, Friedmann PD, Stein MD. Physician attitudes regarding the prescription of medical  
8 marijuana. *J Addict Dis* 2005;24(3):87-93.  
9  
10 12. Kondrad E, Reid A. Colorado family physicians' attitudes toward medical marijuana. *J Am Board*  
11 *Fam Med* 2013;26(1):52-60.  
12  
13 13. Crowley D, Collins C, Delargy I, et al. Irish general practitioner attitudes toward decriminalisation  
14 and medical use of cannabis: results from a national survey. *Harm Reduct J* 2017;14(1):4.  
15  
16 14. Adler JN, Colbert JA. Medicinal Use of Marijuana — Polling Results. *N Engl J Med*  
17 2013;368(22):e30.  
18  
19 15. Department of Health. GP Workforce Statistics – 2001-02 to 2016-17. Canberra: Commonwealth  
20 of Australia; 2017.  
21 <http://www.health.gov.au/internet/main/publishing.nsf/content/General+Practice+Statistics-1>  
22 (accessed Nov 2017).  
23  
24  
25  
26  
27 16. National Academies of Sciences E, and Medicine,. The health effects of cannabis and  
28 cannabinoids: The current state of evidence and recommendations for research. Washington,  
29 DC: National Academies Press; 2017. <https://www.ncbi.nlm.nih.gov/books/NBK423845/>  
30 (accessed Nov 2017).  
31  
32  
33  
34 17. Whiting, P. F., Wolff, R. F., Deshpande, S., et al (2015). Cannabinoids for medical use: a  
35 systematic review and meta-analysis. *JAMA*, 313(24), 2456-2473.  
36  
37 18. Norberg, M. M., Gates, P., Dillon, P., et al (2012). Screening and managing cannabis use:  
38 comparing GP's and nurses' knowledge, beliefs, and behavior. *Subst Abuse Treat Prev Policy*, 7(1),  
39 31.  
40  
41  
42 19. Queensland Health. Clinical Guidance: for the use of medicinal cannabis products in Queensland.  
43 Brisbane: Queensland Health; 2017.  
44 [https://www.health.qld.gov.au/\\_\\_data/assets/pdf\\_file/0023/634163/med-cannabis-clinical-](https://www.health.qld.gov.au/__data/assets/pdf_file/0023/634163/med-cannabis-clinical-guide.pdf)  
45 [guide.pdf](https://www.health.qld.gov.au/__data/assets/pdf_file/0023/634163/med-cannabis-clinical-guide.pdf) (accessed Nov 2017).  
46  
47  
48  
49 20. Victorian Law Reform Commission. Medicinal cannabis: report. Melbourne: Victorian Law Reform  
50 Commission; 2015. [http://lawreform.vic.gov.au/projects/medicinal-cannabis/medicinal-](http://lawreform.vic.gov.au/projects/medicinal-cannabis/medicinal-cannabis-report-pdf)  
51 [cannabis-report-pdf](http://lawreform.vic.gov.au/projects/medicinal-cannabis/medicinal-cannabis-report-pdf) (accessed Nov 2017).  
52  
53  
54  
55  
56  
57  
58  
59  
60

- 1  
2  
3 21. Nugent SM, Morasco BJ, O'Neil ME, et al. The Effects of Cannabis Among Adults With Chronic  
4 Pain and an Overview of General Harms: A Systematic Review. *Ann Intern Med* 2017;167(5):319-  
5 331.  
6  
7  
8 22. Australian and New Zealand College of Anaesthetists. 'Medicinal' cannabis: Where's the  
9 evidence? ANZCA Bulletin, September 2016. Victoria: ANZCA; 2016.  
10 [www.anzca.edu.au/documents/anzca-bulletin-september-2016.pdf](http://www.anzca.edu.au/documents/anzca-bulletin-september-2016.pdf) (accessed Nov 2017).  
11  
12 23. Carlini BH, Garrett SB, Carter GT. Medicinal cannabis: a survey among health care providers in  
13 Washington state. *Am J Hosp Palliat Care* 2017;34(1):85-91.  
14  
15 24. Nutt D, King LA, Saulsbury W, et al. Development of a rational scale to assess the harm of drugs  
16 of potential misuse. *Lancet* 2007;369(9566):1047-1053.  
17  
18 25. Australian Institute of Health and Welfare. Alcohol and other drug treatment services in Australia  
19 2015–16: key findings, Table S2. Canberra: AIHW; 2017.  
20  
21 [https://www.aihw.gov.au/reports/alcohol-other-drug-treatment-services/aodts-2015-16-key-](https://www.aihw.gov.au/reports/alcohol-other-drug-treatment-services/aodts-2015-16-key-findings/data)  
22 [findings/data](https://www.aihw.gov.au/reports/alcohol-other-drug-treatment-services/aodts-2015-16-key-findings/data) (accessed Nov 2017).  
23  
24 26. Royal Australian College of General Practitioners. RACGP Submission: GP prescribing rights for  
25 Isotretinoin. Melbourne: RACGP; 2014.  
26  
27 <https://www.racgp.org.au/yourracgp/news/reports/201405isotretinoin> (accessed Nov 2017).  
28  
29 27. Ziemianski D, Capler R, Tekanoff R, et al. Cannabis in medicine: a national educational needs  
30 assessment among Canadian physicians. *BMC Med Educ* 2015;15:52.  
31  
32 28. Royal Australian College of General Practitioners. The regulatory framework for medicinal use of  
33 cannabis product: Position Statement – March 2018. Melbourne: RACGP; 2018.  
34  
35 [https://www.racgp.org.au/download/Documents/Policies/Health%20systems/Regulatory-](https://www.racgp.org.au/download/Documents/Policies/Health%20systems/Regulatory-framework-for-medicinal-use-of-cannabis-products-.pdf)  
36 [framework-for-medicinal-use-of-cannabis-products-.pdf](https://www.racgp.org.au/download/Documents/Policies/Health%20systems/Regulatory-framework-for-medicinal-use-of-cannabis-products-.pdf)  
37  
38 29. Bonevski B, Magin P, Horton G, et al. Response rates in GP surveys - trialling two recruitment  
39 strategies. *Aust Fam Physician* 2011;40(6):427-430.  
40  
41 30. Cull W, O'Conner K, Sharp S, et al. Respond rates and response bias for 50 survey for  
42 pediatricians. *Health Serv Res* 2005; 40(1):213-226  
43  
44  
45  
46  
47  
48  
49  
50  
51  
52  
53  
54  
55  
56  
57  
58  
59  
60

### Figure legends

Figure 1. Attitudes and clinical experiences of general practitioners with respect to medicinal cannabis, n = 632 – 637, valid percentage.

Figure 2. Ratings of general practitioners on knowledge-related items, n = 636 – 640, valid percentage. RACGP=Royal Australian College of General Practitioners.

Figure 3. Support for use of medicinal cannabis in different conditions, n = 627 – 632, valid percentage. CINV=Chemotherapy-induced Nausea and Vomiting; MS=Multiple sclerosis; PTSD=Post-Traumatic Stress Disorder.

Figure 4. Ratings of relative hazards of medicinal cannabis compared to other prescription medicines, n = 627 – 632, valid percentage.



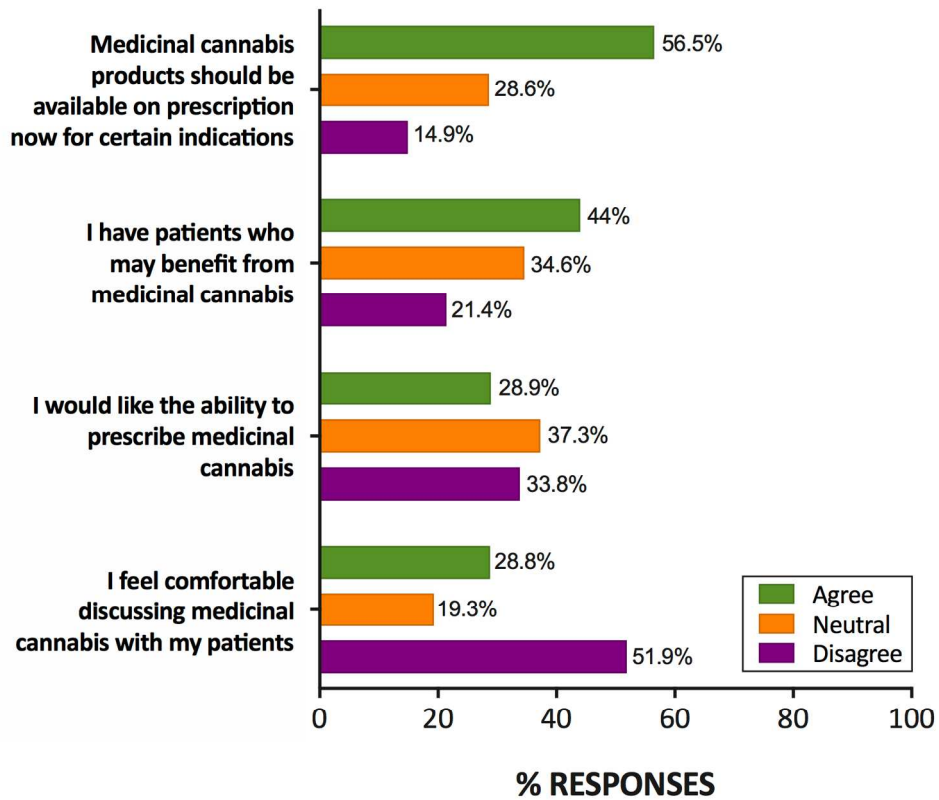

Figure 1. Attitudes and clinical experiences of general practitioners with respect to medicinal cannabis, n = 632 – 637, valid percentage.

159x133mm (300 x 300 DPI)

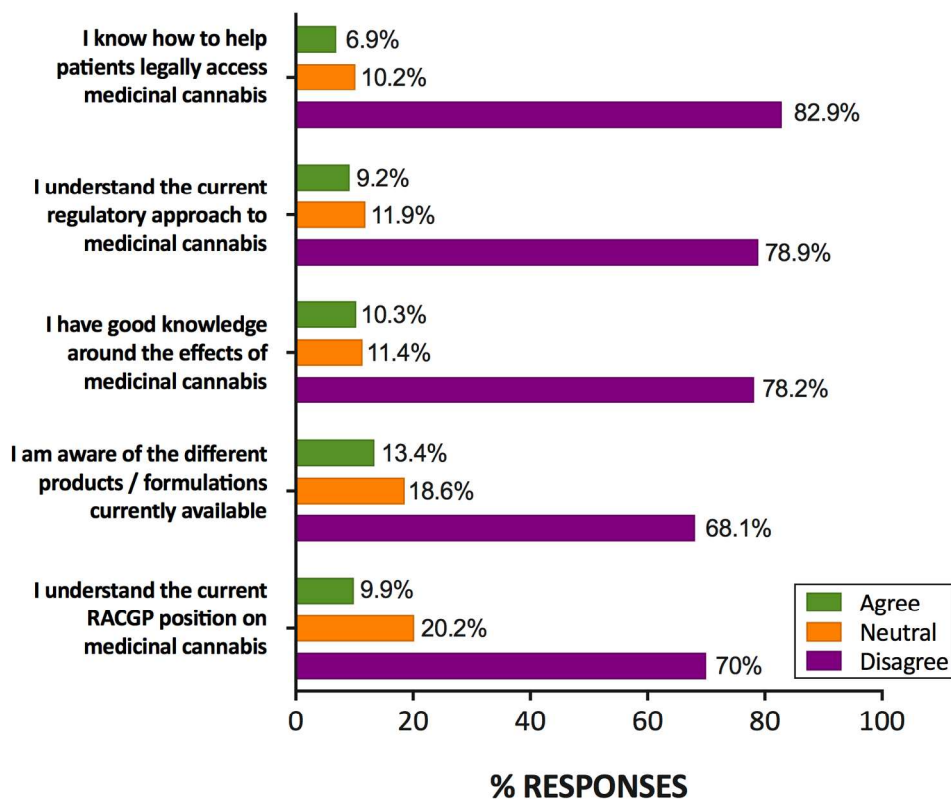

Figure 2. Ratings of general practitioners on knowledge-related items, n = 636 – 640, valid percentage. RACGP=Royal Australian College of General Practitioners.

160x134mm (300 x 300 DPI)

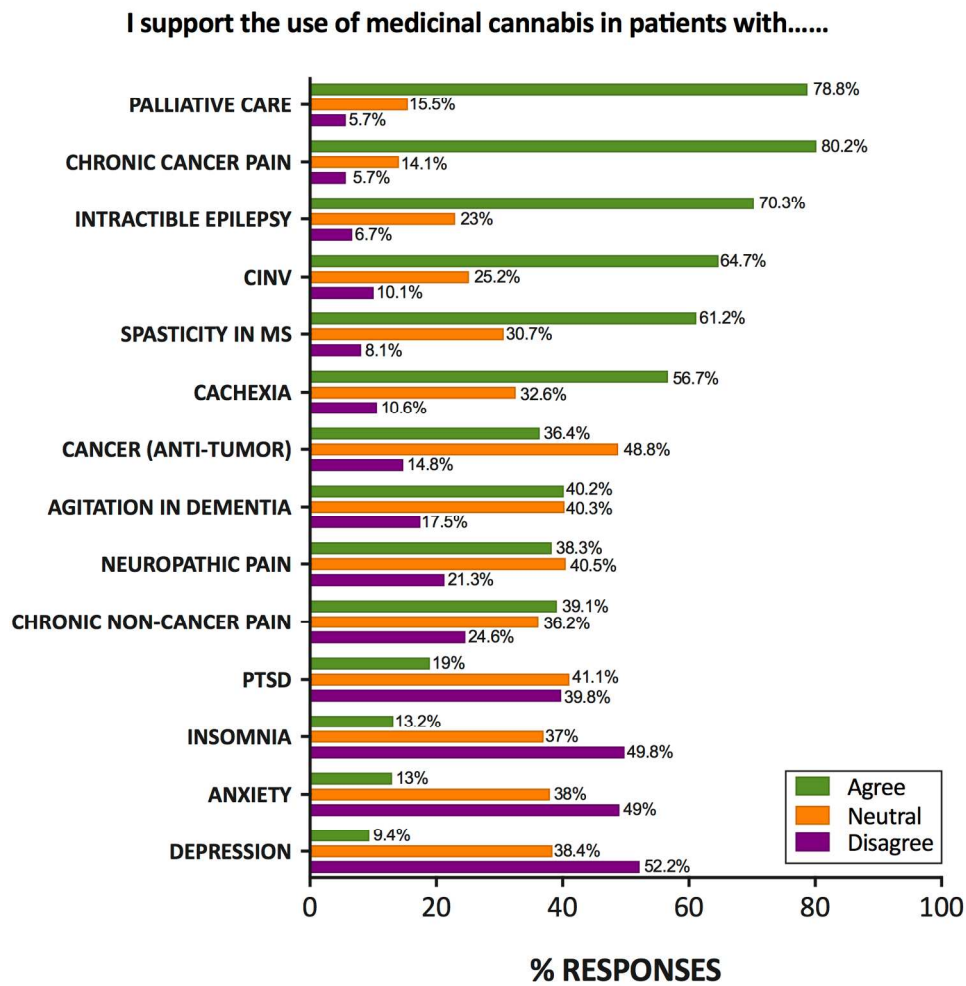

Figure 3. Support for use of medicinal cannabis in different conditions, n = 627 – 632, valid percentage. CINV=Chemotherapy-induced Nausea and Vomiting; MS=Multiple sclerosis; PTSD=Post-Traumatic Stress Disorder.

166x173mm (300 x 300 DPI)

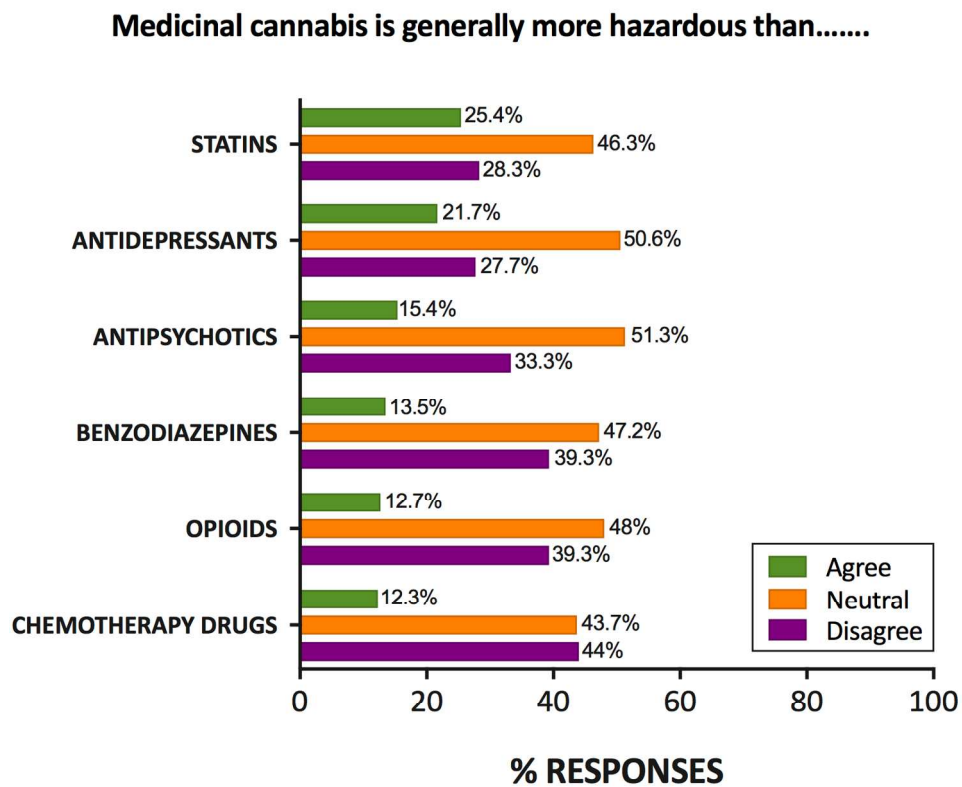

33 Figure 4. Ratings of relative hazards of medicinal cannabis compared to other prescription medicines, n =  
34 627 – 632, valid percentage.

35 149x121mm (300 x 300 DPI)

36  
37  
38  
39  
40  
41  
42  
43  
44  
45  
46  
47  
48  
49  
50  
51  
52  
53  
54  
55  
56  
57  
58  
59  
60

Only

# MEDICINAL CANNABIS SURVEY FOR GPs

|                                                                 |                                |                                |                                   |                                 |                                     |                              |                                |
|-----------------------------------------------------------------|--------------------------------|--------------------------------|-----------------------------------|---------------------------------|-------------------------------------|------------------------------|--------------------------------|
| Profession                                                      | <input type="checkbox"/> GP    | <input type="checkbox"/> NURSE | <input type="checkbox"/> MIDWIFE  | <input type="checkbox"/> PHYSIO | <input type="checkbox"/> PHARMACIST | <input type="checkbox"/> O&G | <input type="checkbox"/> OTHER |
| Age category                                                    | <input type="checkbox"/> <35   | <input type="checkbox"/> 35-44 | <input type="checkbox"/> 45-54    | <input type="checkbox"/> 55-64  | <input type="checkbox"/> 65+        |                              |                                |
| Sex                                                             | <input type="checkbox"/> M     | <input type="checkbox"/> F     | <input type="checkbox"/> OTHER    |                                 |                                     |                              |                                |
| Years in general practice                                       | <input type="checkbox"/> <2    | <input type="checkbox"/> 2-5   | <input type="checkbox"/> 6-15     | <input type="checkbox"/> 16-25  | <input type="checkbox"/> 26+        |                              |                                |
| GP registrar?                                                   | <input type="checkbox"/> Y     | <input type="checkbox"/> N     |                                   |                                 |                                     |                              |                                |
| Average hours spend in clinical practice per week               | <input type="checkbox"/> <10   | <input type="checkbox"/> 11-20 | <input type="checkbox"/> 21-30    | <input type="checkbox"/> 31-40  | <input type="checkbox"/> >40        |                              |                                |
| Size of Practice (number of GPs)                                | <input type="checkbox"/> 1     | <input type="checkbox"/> 2-4   | <input type="checkbox"/> 5-9      | <input type="checkbox"/> 10-20  | <input type="checkbox"/> >20        |                              |                                |
| State/Territory of the Practice you work in                     | <input type="checkbox"/> NSW   | <input type="checkbox"/> VIC   | <input type="checkbox"/> QLD      | <input type="checkbox"/> SA     | <input type="checkbox"/> TAS        | <input type="checkbox"/> WA  | <input type="checkbox"/> ACT   |
| Geographical area serviced                                      | <input type="checkbox"/> METRO |                                | <input type="checkbox"/> REGIONAL |                                 | <input type="checkbox"/> REMOTE     |                              |                                |
| Did you attend the Women and Children's Health event this year? | <input type="checkbox"/> Y     | <input type="checkbox"/> N     |                                   |                                 |                                     |                              |                                |

|                                                                                                                        |                            |                            |                              |                               |                              |
|------------------------------------------------------------------------------------------------------------------------|----------------------------|----------------------------|------------------------------|-------------------------------|------------------------------|
|                                                                                                                        | <input type="checkbox"/> 0 | <input type="checkbox"/> 1 | <input type="checkbox"/> 2-5 | <input type="checkbox"/> 6-10 | <input type="checkbox"/> >10 |
| 1. In the past 3 months, how many of your patients have enquired about medicinal cannabis products?                    | <input type="checkbox"/>   | <input type="checkbox"/>   | <input type="checkbox"/>     | <input type="checkbox"/>      | <input type="checkbox"/>     |
|                                                                                                                        | <b>STRONGLY DISAGREE</b>   | <b>SLIGHTLY DISAGREE</b>   | <b>NEUTRAL</b>               | <b>SLIGHTLY AGREE</b>         | <b>STRONGLY AGREE</b>        |
| 2. I have patients who may benefit from medicinal cannabis                                                             | <input type="checkbox"/>   | <input type="checkbox"/>   | <input type="checkbox"/>     | <input type="checkbox"/>      | <input type="checkbox"/>     |
| 3. Medicinal cannabis products should be available on prescription now for certain indications                         | <input type="checkbox"/>   | <input type="checkbox"/>   | <input type="checkbox"/>     | <input type="checkbox"/>      | <input type="checkbox"/>     |
| 4. I feel comfortable discussing medicinal cannabis with my patients                                                   | <input type="checkbox"/>   | <input type="checkbox"/>   | <input type="checkbox"/>     | <input type="checkbox"/>      | <input type="checkbox"/>     |
| 5. I have good knowledge around the effects of medicinal cannabis products                                             | <input type="checkbox"/>   | <input type="checkbox"/>   | <input type="checkbox"/>     | <input type="checkbox"/>      | <input type="checkbox"/>     |
| 6. I am aware of the different medicinal cannabis products and formulations currently available                        | <input type="checkbox"/>   | <input type="checkbox"/>   | <input type="checkbox"/>     | <input type="checkbox"/>      | <input type="checkbox"/>     |
| 7. I would like the ability to prescribe medicinal cannabis products                                                   | <input type="checkbox"/>   | <input type="checkbox"/>   | <input type="checkbox"/>     | <input type="checkbox"/>      | <input type="checkbox"/>     |
| 8. Medicinal cannabis should only be prescribed by specialists                                                         | <input type="checkbox"/>   | <input type="checkbox"/>   | <input type="checkbox"/>     | <input type="checkbox"/>      | <input type="checkbox"/>     |
| 9. Medicinal cannabis should be provided in "shared care" with a specialist                                            | <input type="checkbox"/>   | <input type="checkbox"/>   | <input type="checkbox"/>     | <input type="checkbox"/>      | <input type="checkbox"/>     |
| 10. Only GPs who have undergone specific training and credentialing should be allowed to prescribe medicinal cannabis  | <input type="checkbox"/>   | <input type="checkbox"/>   | <input type="checkbox"/>     | <input type="checkbox"/>      | <input type="checkbox"/>     |
| 11. I know how to help patients legally access medicinal cannabis                                                      | <input type="checkbox"/>   | <input type="checkbox"/>   | <input type="checkbox"/>     | <input type="checkbox"/>      | <input type="checkbox"/>     |
| 12. I understand the current regulatory approach to medicinal cannabis                                                 | <input type="checkbox"/>   | <input type="checkbox"/>   | <input type="checkbox"/>     | <input type="checkbox"/>      | <input type="checkbox"/>     |
| 13. I understand the current RACGP position on medicinal cannabis                                                      | <input type="checkbox"/>   | <input type="checkbox"/>   | <input type="checkbox"/>     | <input type="checkbox"/>      | <input type="checkbox"/>     |
| 14. There is little difference between "street cannabis" and medicinal cannabis products                               | <input type="checkbox"/>   | <input type="checkbox"/>   | <input type="checkbox"/>     | <input type="checkbox"/>      | <input type="checkbox"/>     |
| 15. I will not prescribe medicinal cannabis as the risk of abuse and dependence is too high                            | <input type="checkbox"/>   | <input type="checkbox"/>   | <input type="checkbox"/>     | <input type="checkbox"/>      | <input type="checkbox"/>     |
| 16. I will not prescribe medicinal cannabis as the risk of side effects (other than abuse and dependence) is too high. | <input type="checkbox"/>   | <input type="checkbox"/>   | <input type="checkbox"/>     | <input type="checkbox"/>      | <input type="checkbox"/>     |
| 17. There is sufficient scientific evidence of the efficacy of medicinal cannabis                                      | <input type="checkbox"/>   | <input type="checkbox"/>   | <input type="checkbox"/>     | <input type="checkbox"/>      | <input type="checkbox"/>     |



STRONGLY DISAGREE    SLIGHTLY DISAGREE    NEUTRAL    SLIGHTLY AGREE    STRONGLY AGREE

18 . I support the use of medicinal cannabis in patients with:

|    |                                                 |                          |                          |                          |                          |                          |
|----|-------------------------------------------------|--------------------------|--------------------------|--------------------------|--------------------------|--------------------------|
| 1  | <i>Chronic cancer pain</i>                      | <input type="checkbox"/> |
| 2  | <i>Chronic non-cancer pain</i>                  | <input type="checkbox"/> |
| 3  | <i>Neuropathic pain</i>                         | <input type="checkbox"/> |
| 4  | <i>Intractable epilepsy</i>                     | <input type="checkbox"/> |
| 5  | <i>Anti-tumour effects</i>                      | <input type="checkbox"/> |
| 6  | <i>Spasticity in Multiple Sclerosis</i>         | <input type="checkbox"/> |
| 7  | <i>Dementia patients with agitation</i>         | <input type="checkbox"/> |
| 8  | <i>Insomnia</i>                                 | <input type="checkbox"/> |
| 9  | <i>PTSD</i>                                     | <input type="checkbox"/> |
| 10 | <i>Anxiety</i>                                  | <input type="checkbox"/> |
| 11 | <i>Depression</i>                               | <input type="checkbox"/> |
| 12 | <i>End of life/Palliative care</i>              | <input type="checkbox"/> |
| 13 | <i>Chemotherapy-induced nausea and vomiting</i> | <input type="checkbox"/> |
| 14 | <i>Cachexia associated with severe illness</i>  | <input type="checkbox"/> |

19 . The major side effects of medicinal cannabis consumption include:

|    |                                             |                          |                          |                          |                          |                          |
|----|---------------------------------------------|--------------------------|--------------------------|--------------------------|--------------------------|--------------------------|
| 20 | <i>Addiction and dependence</i>             | <input type="checkbox"/> |
| 21 | <i>Cognitive impairment</i>                 | <input type="checkbox"/> |
| 22 | <i>Driving impairment</i>                   | <input type="checkbox"/> |
| 23 | <i>Weight gain</i>                          | <input type="checkbox"/> |
| 24 | <i>Psychosis</i>                            | <input type="checkbox"/> |
| 25 | <i>Other long-term mental health issues</i> | <input type="checkbox"/> |
| 26 | <i>Interactions with other medications</i>  | <input type="checkbox"/> |
| 27 | <i>Impact on the developing brain</i>       | <input type="checkbox"/> |

20 . Medicinal cannabis is generally more hazardous than:

|    |                             |                          |                          |                          |                          |                          |
|----|-----------------------------|--------------------------|--------------------------|--------------------------|--------------------------|--------------------------|
| 33 | <i>Prescription opioids</i> | <input type="checkbox"/> |
| 34 | <i>Benzodiazepines</i>      | <input type="checkbox"/> |
| 35 | <i>Antipsychotics</i>       | <input type="checkbox"/> |
| 36 | <i>Statins</i>              | <input type="checkbox"/> |
| 37 | <i>Chemotherapy drugs</i>   | <input type="checkbox"/> |
| 38 | <i>Antidepressants</i>      | <input type="checkbox"/> |

21 . The right to prescribe medicinal cannabis should be available to: **CHOOSE ONE RESPONSE ONLY**

|    |                                                                   |                          |
|----|-------------------------------------------------------------------|--------------------------|
| 43 | <i>All GPs</i>                                                    | <input type="checkbox"/> |
| 44 | <i>Only GPs with specific training and credentials</i>            | <input type="checkbox"/> |
| 45 | <i>Only GPs in 'shared care' with a specialist</i>                | <input type="checkbox"/> |
| 46 | <i>Only specialists</i>                                           | <input type="checkbox"/> |
| 47 | <i>Medicinal cannabis should not be available on prescription</i> | <input type="checkbox"/> |

**OPEN ENDED COMMENTS**

Please use this space to offer any comments, opinions or observations about medicinal cannabis in Australia

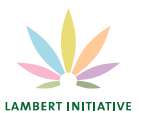

**STROBE 2007 (v4) Statement—Checklist of items that should be included in reports of *cross-sectional studies***

| Section/Topic                | Item # | Recommendation                                                                                                                                                                       | Reported on page # |
|------------------------------|--------|--------------------------------------------------------------------------------------------------------------------------------------------------------------------------------------|--------------------|
| Title and abstract           | 1      | (a) Indicate the study's design with a commonly used term in the title or the abstract                                                                                               | 1                  |
|                              |        | (b) Provide in the abstract an informative and balanced summary of what was done and what was found                                                                                  | 2                  |
| <b>Introduction</b>          |        |                                                                                                                                                                                      |                    |
| Background/rationale         | 2      | Explain the scientific background and rationale for the investigation being reported                                                                                                 | 4-5                |
| Objectives                   | 3      | State specific objectives, including any prespecified hypotheses                                                                                                                     | 5                  |
| <b>Methods</b>               |        |                                                                                                                                                                                      |                    |
| Study design                 | 4      | Present key elements of study design early in the paper                                                                                                                              | 5-6                |
| Setting                      | 5      | Describe the setting, locations, and relevant dates, including periods of recruitment, exposure, follow-up, and data collection                                                      | 6-7                |
| Participants                 | 6      | (a) Give the eligibility criteria, and the sources and methods of selection of participants                                                                                          | 6                  |
| Variables                    | 7      | Clearly define all outcomes, exposures, predictors, potential confounders, and effect modifiers. Give diagnostic criteria, if applicable                                             | 6-8                |
| Data sources/<br>measurement | 8*     | For each variable of interest, give sources of data and details of methods of assessment (measurement). Describe comparability of assessment methods if there is more than one group | 7-8                |
| Bias                         | 9      | Describe any efforts to address potential sources of bias                                                                                                                            | 17                 |
| Study size                   | 10     | Explain how the study size was arrived at                                                                                                                                            | 6                  |
| Quantitative variables       | 11     | Explain how quantitative variables were handled in the analyses. If applicable, describe which groupings were chosen and why                                                         | NA                 |
| Statistical methods          | 12     | (a) Describe all statistical methods, including those used to control for confounding                                                                                                | 7-8                |
|                              |        | (b) Describe any methods used to examine subgroups and interactions                                                                                                                  | 7-8                |
|                              |        | (c) Explain how missing data were addressed                                                                                                                                          | 7                  |
|                              |        | (d) If applicable, describe analytical methods taking account of sampling strategy                                                                                                   | NA                 |
|                              |        | (e) Describe any sensitivity analyses                                                                                                                                                | NA                 |

|                          |     |                                                                                                                                                                                                              |                                                                                      |
|--------------------------|-----|--------------------------------------------------------------------------------------------------------------------------------------------------------------------------------------------------------------|--------------------------------------------------------------------------------------|
| <b>Results</b>           |     |                                                                                                                                                                                                              |                                                                                      |
| Participants             | 13* | (a) Report numbers of individuals at each stage of study—eg numbers potentially eligible, examined for eligibility, confirmed eligible, included in the study, completing follow-up, and analysed            | 6, 8                                                                                 |
|                          |     | (b) Give reasons for non-participation at each stage                                                                                                                                                         | NA                                                                                   |
|                          |     | (c) Consider use of a flow diagram                                                                                                                                                                           | NA                                                                                   |
| Descriptive data         | 14* | (a) Give characteristics of study participants (eg demographic, clinical, social) and information on exposures and potential confounders                                                                     | 8-9                                                                                  |
|                          |     | (b) Indicate number of participants with missing data for each variable of interest                                                                                                                          | Percentage of valid responses stated for each categorical variable in tables/figures |
| Outcome data             | 15* | Report numbers of outcome events or summary measures                                                                                                                                                         | NA                                                                                   |
| Main results             | 16  | (a) Give unadjusted estimates and, if applicable, confounder-adjusted estimates and their precision (eg, 95% confidence interval). Make clear which confounders were adjusted for and why they were included | NA                                                                                   |
|                          |     | (b) Report category boundaries when continuous variables were categorized                                                                                                                                    | NA                                                                                   |
|                          |     | (c) If relevant, consider translating estimates of relative risk into absolute risk for a meaningful time period                                                                                             | NA                                                                                   |
| Other analyses           | 17  | Report other analyses done—eg analyses of subgroups and interactions, and sensitivity analyses                                                                                                               | NA                                                                                   |
| <b>Discussion</b>        |     |                                                                                                                                                                                                              |                                                                                      |
| Key results              | 18  | Summarise key results with reference to study objectives                                                                                                                                                     | 14-15                                                                                |
| Limitations              | 19  | Discuss limitations of the study, taking into account sources of potential bias or imprecision. Discuss both direction and magnitude of any potential bias                                                   | 17                                                                                   |
| Interpretation           | 20  | Give a cautious overall interpretation of results considering objectives, limitations, multiplicity of analyses, results from similar studies, and other relevant evidence                                   | 17                                                                                   |
| Generalisability         | 21  | Discuss the generalisability (external validity) of the study results                                                                                                                                        | 17                                                                                   |
| <b>Other information</b> |     |                                                                                                                                                                                                              |                                                                                      |
| Funding                  | 22  | Give the source of funding and the role of the funders for the present study and, if applicable, for the original study on which the present article is based                                                | 18                                                                                   |

\*Give information separately for cases and controls in case-control studies and, if applicable, for exposed and unexposed groups in cohort and cross-sectional studies.



1  
2  
3  
4 **Note:** An Explanation and Elaboration article discusses each checklist item and gives methodological background and published examples of transparent reporting. The STROBE  
5 checklist is best used in conjunction with this article (freely available on the Web sites of PLoS Medicine at <http://www.plosmedicine.org/>, Annals of Internal Medicine at  
6 <http://www.annals.org/>, and Epidemiology at <http://www.epidem.com/>). Information on the STROBE Initiative is available at [www.strobe-statement.org](http://www.strobe-statement.org).  
7  
8  
9  
10  
11  
12  
13  
14  
15  
16  
17  
18  
19  
20  
21  
22  
23  
24  
25  
26  
27  
28  
29  
30  
31  
32  
33  
34  
35  
36  
37  
38  
39  
40  
41  
42  
43  
44  
45  
46  
47

For peer review only
